# Supplementary material for: Synthesis of benzo[4,5]imidazo[1,2-a]pyrimidines and 2,3-dihydroquinazolin-4(1H)-ones under metal-free and solvent-free conditions for minimizing waste generation
Source: Royal Society of Chemistry journal article supplement (doi:10.1039/c8ra07256f), 2018-01-01
Supplement: c8ra07256f1.pdf [file c8ra07256f1.pdf]

## Supporting information

### **Synthesis of benzo[4,5]imidazo[1,2-a]pyrimidines and 2,3-dihydroquinazolin-4(1*H*)-ones under metal-free and solvent-free conditions**

Phuong Hoang Tran,\* Thanh-Phuong Thi Bui, Xuan-Quynh Bach Lam, Xuan-Trang Thi Nguyen

#### Table of content

|                                                                                                        |                |
|--------------------------------------------------------------------------------------------------------|----------------|
| <b>Section S1. Chemicals and instruments</b>                                                           | <b>S2</b>      |
| <b>Section S2. Synthesis of [(4-SO<sub>3</sub>H)BMIM]HSO<sub>4</sub> under solvent-free sonication</b> | <b>S2-S8</b>   |
| <b>Section S3. General procedure and spectral data of benzo[4,5]imidazo[1,2-a]pyrimidines.</b>         | <b>S8-S18</b>  |
| <b>Section S4. General procedure and spectral data of 2,3-dihydroquinazolin-4(1<i>H</i>)-one</b>       | <b>S18-S21</b> |
| <b>Section S5. <sup>1</sup>H and <sup>13</sup>C NMR spectra</b>                                        | <b>S22-S48</b> |
| <b>Section S6. References</b>                                                                          | <b>S49</b>     |

## Section S1. Chemicals and instruments

1,4-butanediol (99%), anthranilamide (99%), benzaldehyde (99%), 4-methylbenzaldehyde (98%), 1-methylimidazole (99%), ethyl acetoacetate (99%), benzaldehyde (99%), 4-methoxybenzaldehyde (98%), 4-fluorobenzaldehyde (98%), 4-chlorobenzaldehyde (97%), 4-nitrobenzaldehyde (98%), 3-chlorobenzaldehyde (97%), (97%), 4-methylbenzaldehyde (98%), 4-cyclohexanecarboxaldehyde (97%), 4-tertbutylbenzaldehyde (98%), 2-fluorobenzaldehyde (97%), 2-chlorobenzaldehyde (98%), 4-hydroxybenzaldehyde (98%), 2-nitrobenzaldehyde (98%), piperonal (99%), acetyl acetate (99%), 2-aminobenzimidazole (97%), sulfuric acid (H<sub>2</sub>SO<sub>4</sub>) were obtained from Sigma-Aldrich Chemical Company.

TLC plates (silica gel 60 F254), acetone, n-hexane, petroleum ether were obtained from Merck. Deuterated solvents, D<sub>2</sub>O and DMSO-*d*<sub>6</sub>, were purchased from Cambridge Isotope Laboratories (Andover, MA) and used without further purification. With Ag were obtained from Armar (Switzerland). Ethyl acetate (purity ≥ 99.5%), *n*-hexane, and chloroform (purity ≥ 99%), ethanol (purity ≥ 99.8%), acetone (purity ≥ 99%), ), methanol (99%), diethyl ether (purity ≥ 99.5%), were obtained from Merck. All starting materials were used without further purification.

GC–MS spectra were performed on an Agilent GC System 7890 equipped with a mass selective detector Agilent 5973N and a capillary DB–5MS column (30 m x 250 μm x 0.25 μm). FT-IR spectra were analyzed from KBr pellets by a Bruker Vertex 70. <sup>1</sup>H and <sup>13</sup>C NMR spectra were recorded on a Bruker Advance 500. HRMS (ESI) data were performed on Bruker micrOTOF-QII MS at 80 eV.

## Section S2. Synthesis of [(4-SO<sub>3</sub>H)BMIM]HSO<sub>4</sub> under solvent-free sonication

The synthesis of the [(4-SO<sub>3</sub>H)BMIM]HSO<sub>4</sub> was synthesized *via* one-pot two-step procedure according to the our previous literature:<sup>1</sup>

**The first step:** 1-Methylimidazole (1.5 mmol, 0.123 g) and 1,4-butane sultone (1.5 mmol, 0.204 g) were added into a 10 mL pressurized glass tube with

Teflon-coated septum. The reaction mixture was irradiated by ultrasound for 5 min at 80 °C (37 kHz). After completion of the reaction, the zwitterion [4-(SO<sub>3</sub><sup>-</sup>)BMIM]<sup>+</sup> was washed with diethyl ether (6 x 5 mL), and dried under vacuum at 80 °C for 30 min to give the pure product.

**The second step:** A mixture of [4-(SO<sub>3</sub><sup>-</sup>)BMIM]<sup>+</sup> (1.5 mmol, 0.327 g) and sulfuric acid 98% (1.5 mmol, 0.147 g) was added into a 10 mL pressurized glass tube with Teflon-coated septum, which was irradiated by ultrasound for 60 min at 60 °C (37 kHz). The mixture reaction was washed with diethyl ether (10 x 3 mL). Then, the mixture [(4-SO<sub>3</sub>H)BMIM]HSO<sub>4</sub> was dried under vacuum at 40 °C. The product was then characterized by <sup>1</sup>H and <sup>13</sup>C NMR, FT-IR, TGA, and HR-MS (ESI).

**Table S1.** Optimization of reaction condition for the first step.

| Entry | Time (min) | Temperature (°C) | Isolated yield (%) |
|-------|------------|------------------|--------------------|
| 1     | 5          | 50               | 65                 |
| 2     | 5          | 60               | 76                 |
| 3     | 5          | 70               | 88                 |
| 4     | 5          | 80               | 99                 |
| 5     | 1          | 80               | 42                 |
| 6     | 3          | 80               | 57                 |

**Table S2.** Optimization of reaction conditions for the second step.

| Entry | Time (min) | Temperature (°C) | Isolated yield (%) |
|-------|------------|------------------|--------------------|
| 1     | 30         | RT (30)          | 0                  |
| 2     | 30         | 40               | 21                 |
| 3     | 30         | 50               | 34                 |
| 4     | 30         | 60               | 53                 |
| 5     | 30         | 70               | 40                 |
| 6     | 40         | 60               | 75                 |
| 7     | 60         | 60               | 95                 |
| 8     | 90         | 60               | 97                 |

**<sup>1</sup>H NMR, <sup>13</sup>C NMR, IR, TGA, and HR-ESI-MS of 1-(4-sulfobutyl)-3-methylimidazolium hydrogen sulfate**

***1-(4-sulfobutyl)-3-methylimidazolium hydrogen sulfate<sup>1</sup>***

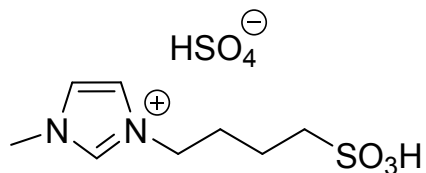

**FT-IR** (KBr, 4000 – 400 cm<sup>-1</sup>) 3410, 1639, 1457, 1171, 1042, 752.

**<sup>1</sup>H NMR** (500 MHz, D<sub>2</sub>O)  $\delta$  8.59 (s, 1H), 7.35 (t,  $J$  = 1.7 Hz, 1H), 7.29 (t,  $J$  = 1.7 Hz, 1H), 4.10 (t,  $J$  = 7.0 Hz, 2H), 3.75 (s, 3H), 2.83 (t,  $J$  = 8.0, 2H), 1.82 (m, 2H), 1.60 (m, 2H).

**<sup>13</sup>C NMR** (125 MHz, D<sub>2</sub>O)  $\delta$  135.9, 123.6, 122.1, 50.0, 48.9, 35.7, 28.1, 20.9.

**HRMS** (ESI)  $m/z$  calcd for [M<sup>+</sup>] C<sub>8</sub>H<sub>15</sub>N<sub>2</sub>O<sub>3</sub>S<sup>+</sup> 219.0798; found 219.0783.

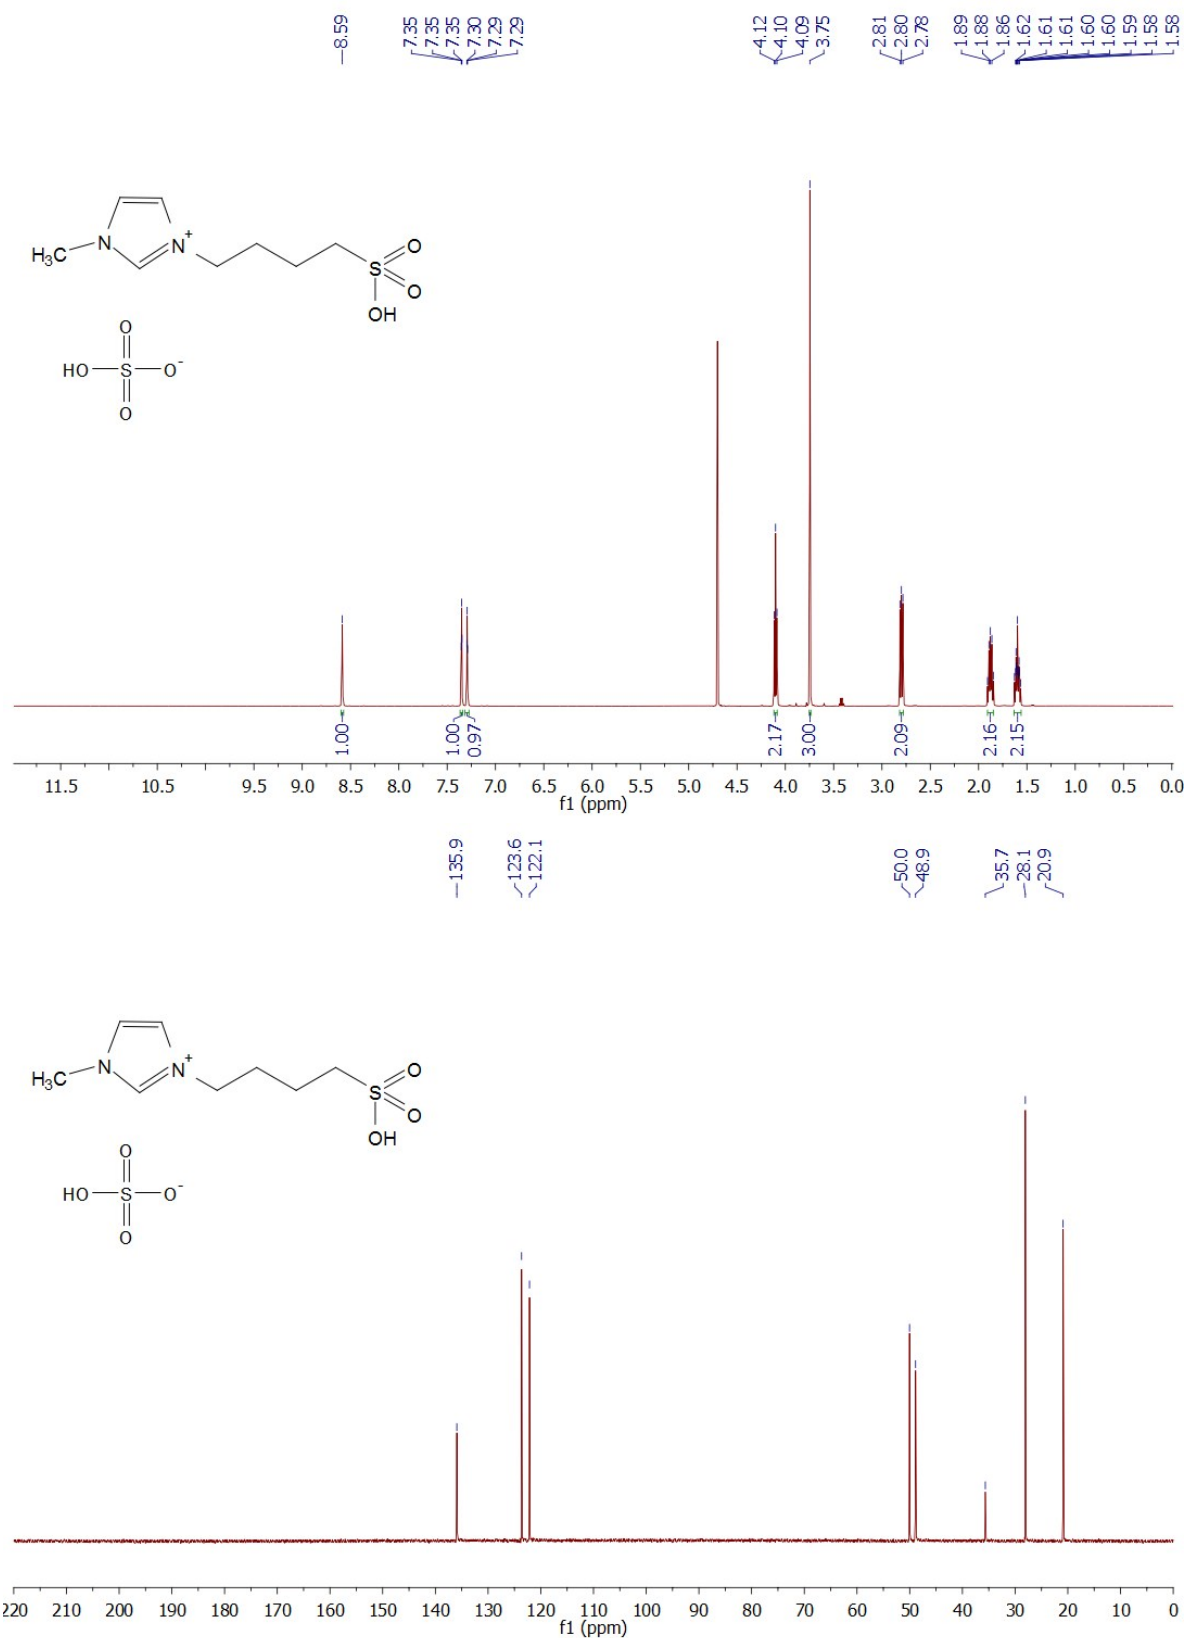

**Figure 1. <sup>1</sup>H (top) and <sup>13</sup>C (bottom) NMR spectra of 1-(4-sulfobutyl)-3-methylimidazolium hydrogen sulfate**

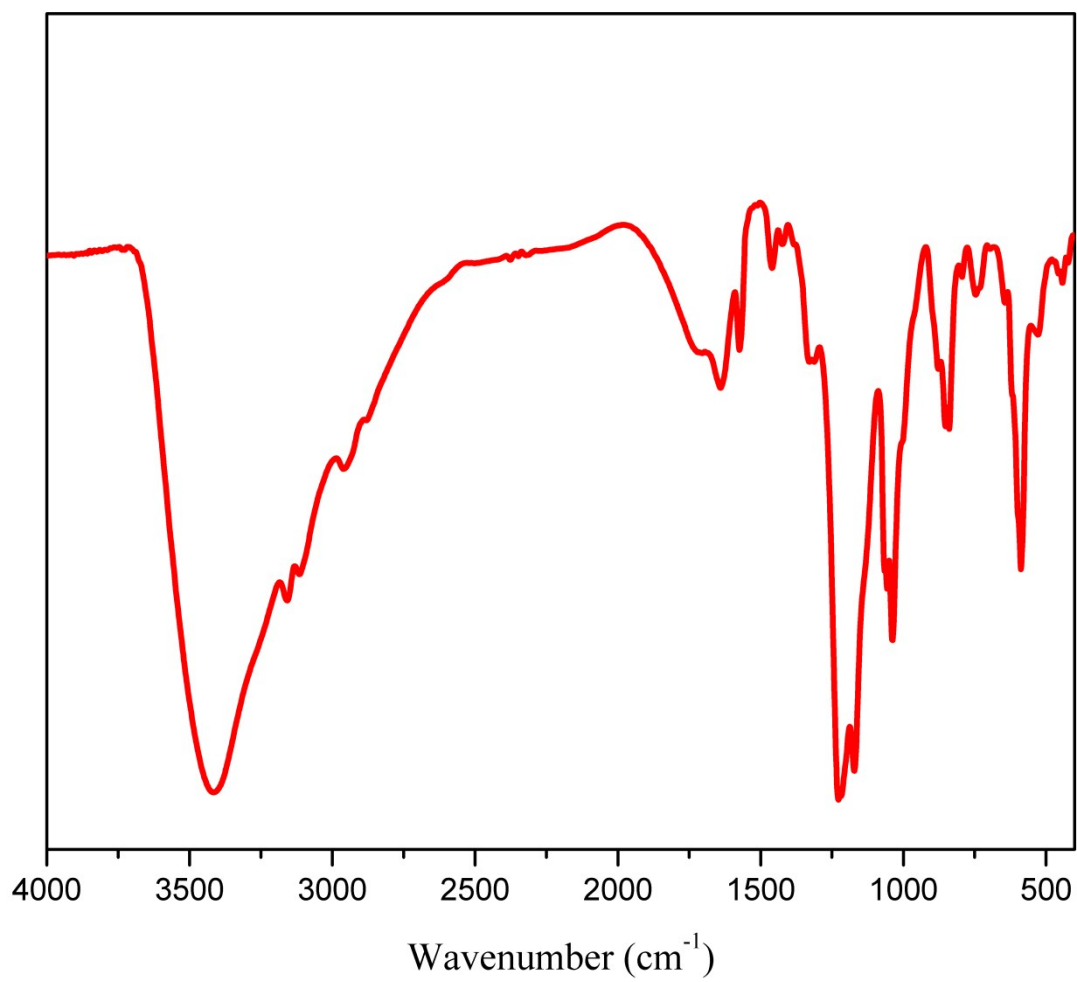

**Figure 2. FT-IR spectrum of 1-(4-sulfobutyl)-3-methylimidazolium hydrogen sulfate**

## Display Report

|                      |                                            |                  |                     |
|----------------------|--------------------------------------------|------------------|---------------------|
| <b>Analysis Info</b> |                                            | Acquisition Date | 1/9/2015 8:46:23 PM |
| Analysis Name        | D:\Data\dmm 2014\ILS_1-B,2_01_14074.d      | Operator         | Mai                 |
| Method               | protein my mass tb.m                       | Instrument       | micrOTOF-Q 10187    |
| Sample Name          | ILS                                        |                  |                     |
| Comment              | 10 ML CR3 QUA C18, RUA GIAI BANG 1 ML MEOH |                  |                     |

|                              |            |                       |           |                  |           |
|------------------------------|------------|-----------------------|-----------|------------------|-----------|
| <b>Acquisition Parameter</b> |            |                       |           |                  |           |
| Source Type                  | ESI        | Ion Polarity          | Positive  | Set Nebulizer    | 1.2 Bar   |
| Focus                        | Not active | Set Capillary         | 4500 V    | Set Dry Heater   | 200 °C    |
| Scan Begin                   | 100 m/z    | Set End Plate Offset  | -500 V    | Set Dry Gas      | 9.0 l/min |
| Scan End                     | 3000 m/z   | Set Collision Cell RF | 200.0 Vpp | Set Divert Valve | Source    |

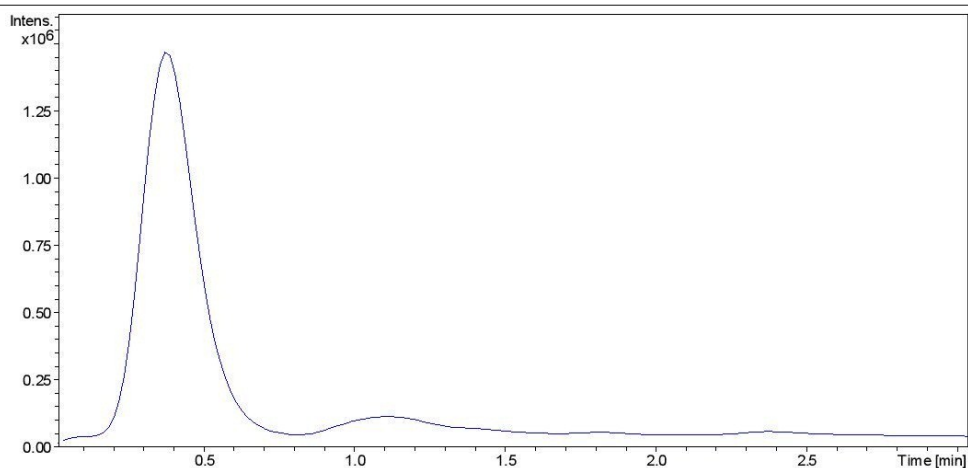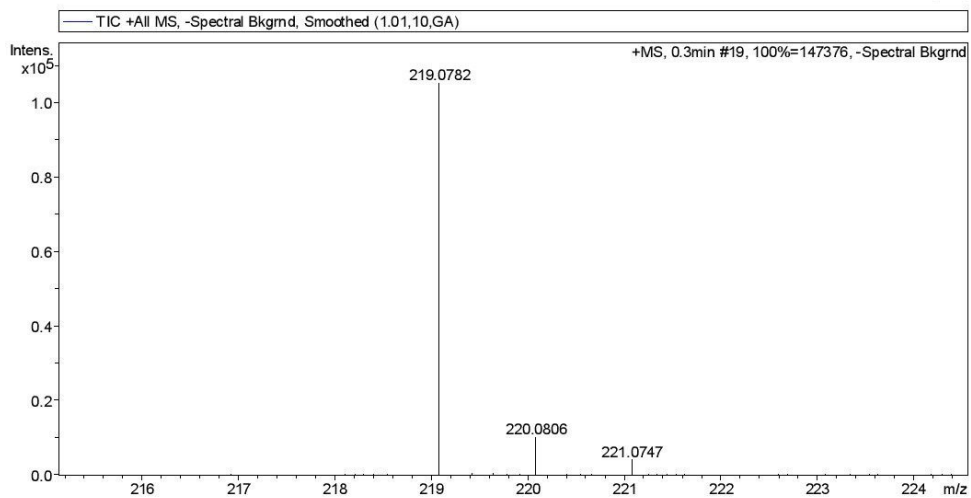

**Figure 3. HR-ESI-MS 1-(4-sulfobutyl)-3-methylimidazolium hydrogen sulfate.**

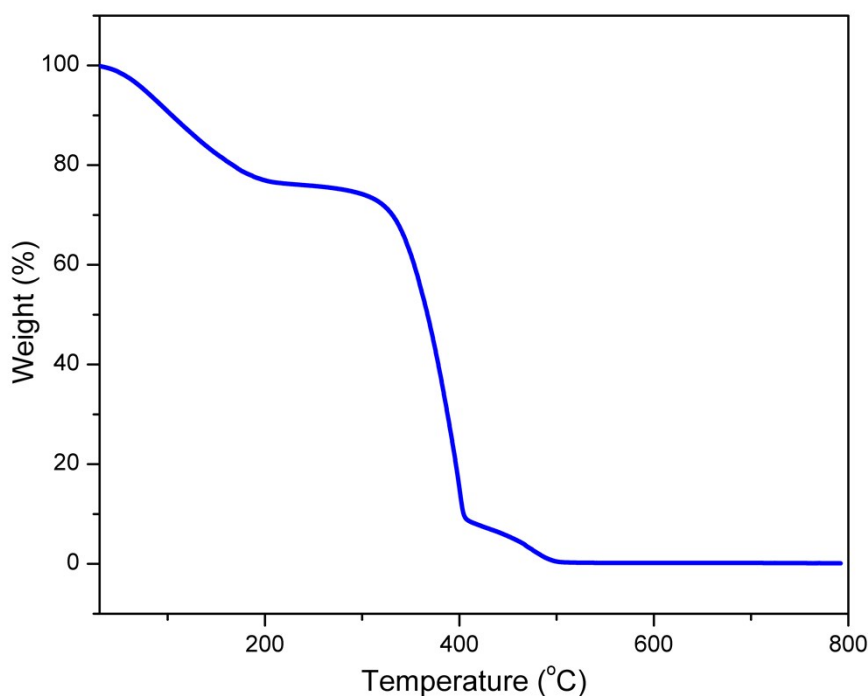

**Figure 4. TGA of 1-(4-sulfobutyl)-3-methylimidazolium hydrogen sulfate**

**Section S3. General procedure and spectral data of benzo[4,5]imidazo[1,2-a]pyrimidines.**

*General procedure of benzo[4,5]imidazo[1,2-a]pyrimidines synthesis*

A mixture of benzaldehyde (106 mg, 1 mmol), ethyl acetoacetate (130 mg, 1 mmol), 2-aminobenzimidazole (133 mg, 1 mmol) and [(4-SO<sub>3</sub>H)BMIM]HSO<sub>4</sub> (31.6 mg, 0.1 mmol) was heated 100 °C and the process of reaction monitored by TLC. After completion of the conversion, the reaction mixture was quenched with cold ethanol (10 mL). The crude product was filtered and washed with petroleum ether (10 mL) and then purified by recrystallization from ethanol to obtain the desired product.

*Spectral data of benzo[4,5]imidazo[1,2-a]pyrimidines synthesis*

***Ethyl 2-methyl-4-phenyl-1,4-dihydrobenzo[4,5]imidazo[1,2-a]pyrimidine-3-carboxylate<sup>2,3</sup>***



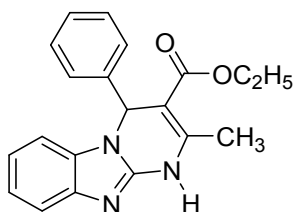

**mp** 287-288 °C

**<sup>1</sup>H NMR (500 MHz, DMSO-*d*<sub>6</sub>)**: δ 7.35 (m, 1H), 7.25 (m, 1H), 7.17 (t, *J* = 7.3 Hz, 1H), 7.04 (t, *J* = 7.5 Hz, 1H), 6.94 (t, *J* = 7.5 Hz, 1H), 6.41 (s, 1H), 4.07 – 3.96 (m, 1H), 2.45 (s, 1H), 2.07 (s, 1H), 1.13 (t, *J* = 7.3 Hz, 1H).

**<sup>13</sup>C NMR (125 MHz, DMSO-*d*<sub>6</sub>)** δ 165.7, 146.9, 146.1, 142.7, 142.5, 132.0, 128.8, 128.2, 128.2, 127.5, 127.5, 122.2, 120.6, 117.2, 110.3, 98.4, 59.8, 56.4, 19.6, 14.5.

***Ethyl 4-(4-methoxyphenyl)-2-methyl-1,4-dihydrobenzo[4,5]imidazo[1,2-a]pyrimidine-3-carboxylate*<sup>2</sup>**

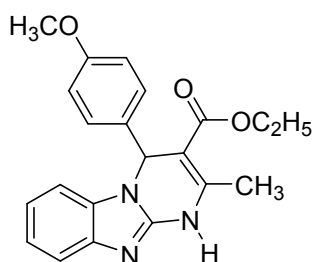

**mp** 269-270 °C

**<sup>1</sup>H NMR (500 MHz, DMSO-*d*<sub>6</sub>)** δ 7.33 (d, *J* = 7.5 Hz, 1H), 7.25 (m, 3H), 7.06 – 7.01 (m, 1H), 6.98 – 6.90 (m, 1H), 6.80 (d, *J* = 8.5 Hz, 2H), 6.37 (s, 1H), 4.14 – 3.91 (m, 2H), 3.66 (s, 3H), 2.44 (s, 3H), 1.15 (t, *J* = 7.3 Hz, 3H).

**<sup>13</sup>C NMR (125 MHz, DMSO-*d*<sub>6</sub>)** δ 165.7, 159.1, 146.6, 146.1, 142.8, 134.6, 132.0, 128.7, 128.7, 122.2, 120.6, 117.2, 114.1, 114.1, 110.3, 98.7, 59.8, 55.8, 55.4, 19.0, 14.6.

***Ethyl 4-(4-fluorophenyl)-2-methyl-1,4-dihydrobenzo[4,5]imidazo[1,2-a]pyrimidine-3-carboxylate*<sup>3</sup>**

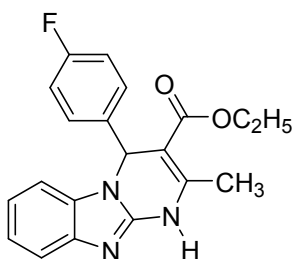

mp 283-284 °C

<sup>1</sup>H NMR (500 MHz, DMSO-*d*<sub>6</sub>) δ 7.40 (m, 2H), 7.34 (d, *J* = 8 Hz, 1H), 7.26 (d, *J* = 8 Hz, 1H), 7.11 – 7.01 (m, 2H), 6.95 (m, 1H), 6.45 (s, 1H), 4.12 – 3.90 (m, 1H), 2.45 (s, 3H), 1.14 (t, *J* = 7.0 Hz, 3H).

<sup>13</sup>C NMR (125 MHz, DMSO-*d*<sub>6</sub>) δ 165.6, 161.9 (d, *J* = 244.0 Hz), 147.1, 145.9, 142.7, 138.8, 131.9, 129.7, 129.6, 122.3, 120.7, 117.3, 115.7, 115.6, 110.3, 98.3, 59.9, 55.7, 19.1, 14.5.

***Ethyl 4-(4-chlorophenyl)-2-methyl-1,4-dihydrobenzo[4,5]imidazo[1,2-*a*]pyrimidine-3-carboxylate<sup>2</sup>***

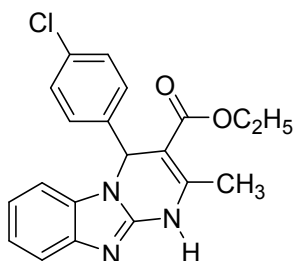

mp 286-287 °C

<sup>1</sup>H NMR (500 MHz, DMSO-*d*<sub>6</sub>) δ 7.46 (m, 1H), 7.36 (d, *J* = 8.0 Hz, 1H), 7.32 – 7.19 (m, 4H), 7.10 – 7.03 (m, 1H), 7.00 – 6.93 (m, 1H), 6.46 (s, 1H), 4.21 – 3.76 (m, 2H), 2.46 (s, 3H), 1.15 (t, *J* = 7.0 Hz, 3H).

<sup>13</sup>C NMR (125 MHz, DMSO-*d*<sub>6</sub>) δ 165.5, 147.5, 145.9, 144.9, 142.7, 133.3, 131.9, 130.9, 128.3, 127.6, 126.1, 122.4, 120.8, 117.4, 110.3, 97.8, 59.9, 55.8, 19.1, 14.5.

***Ethyl 2-methyl-4-(4-nitrophenyl)-1,4-dihydrobenzo[4,5]imidazo[1,2-*a*]pyrimidine-3-carboxylate<sup>3</sup>***

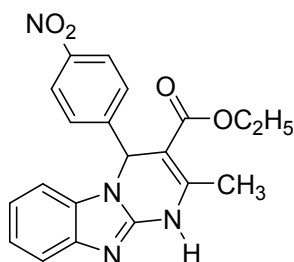

mp >350 °C

**<sup>1</sup>H NMR (500 MHz, DMSO-*d*<sub>6</sub>)** δ 8.13 (d, *J* = 8.5 Hz, 2H), 7.65 (d, *J* = 8.5 Hz, 2H), 7.36 (d, *J* = 8.0 Hz, 1H), 7.26 (d, *J* = 8.0 Hz, 1H), 7.05 (t, *J* = 7.5 Hz, 1H), 6.96 (t, *J* = 7.5 Hz, 1H), 6.60 (s, 1H), 4.02 (m, 2H), 2.47 (s, 3H), 1.15 (t, *J* = 7.0 Hz, 3H).

**<sup>13</sup>C NMR (125 MHz, DMSO-*d*<sub>6</sub>)** δ 165.4, 149.5, 147.4, 145.7, 132.3, 131.8, 129.0, 124.2, 124.1, 122.5, 120.9, 117.5, 110.2, 97.3, 60.0, 55.7, 19.2, 14.5.

**Ethyl 4-(3-chlorophenyl)-2-methyl-1,4-dihydrobenzo[4,5]imidazo[1,2-*a*]pyrimidine-3-carboxylate<sup>2</sup>**

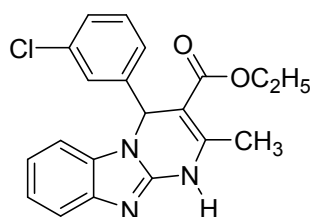

**mp** 269-270 °C

**<sup>1</sup>H NMR (500 MHz, DMSO-*d*<sub>6</sub>)** δ 7.35 (dt, *J* = 11.3, 8.5 Hz, 5H), 7.25 (d, *J* = 8.0 Hz, 1H), 7.08 – 7.01 (m, 1H), 6.98 – 6.92 (m, 1H), 6.44 (s, 1H), 4.25 – 3.67 (m, 2H), 2.45 (s, 3H), 1.14 (t, *J* = 7.1 Hz, 3H).

**<sup>13</sup>C NMR (125 MHz, DMSO-*d*<sub>6</sub>)** δ 165.6, 147.3, 145.9, 142.7, 141.4, 132.8, 131.9, 129.5, 129.5, 128.8, 128.8, 122.4, 120.7, 117.3, 110.3, 98.0, 59.9, 55.7, 19.1, 14.5.

**Ethyl 4-(2-fluorophenyl)-2-methyl-1,4-dihydrobenzo[4,5]imidazo[1,2-*a*]pyrimidine-3-carboxylate<sup>3</sup>**

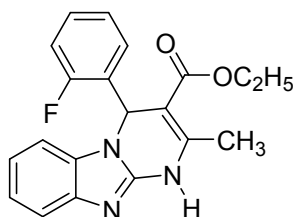

**mp** 288-289 °C

**<sup>1</sup>H NMR (500 MHz, DMSO-*d*<sub>6</sub>)** δ 7.49 – 7.41 (m, 1H), 7.35 (d, *J* = 8.0 Hz, 1H), 7.31 – 7.22 (m, 1H), 7.17 – 7.08 (m, 3H), 7.05 (t, *J* = 7.5 Hz, 1H), 6.96 (t, *J* = 7.5 Hz, 1H), 6.64 (s, 1H), 4.09 – 3.81 (m, 2H), 2.47 (s, 3H), 1.09 (t, *J* = 7.3 Hz, 3H).

**<sup>13</sup>C NMR (125 MHz, DMSO-*d*<sub>6</sub>)** δ 165.5, 159.9 (d, *J* = 246.7 Hz), 147.9, 145.8, 142.6, 132.0, 130.6 (d, *J* = 8.4 Hz), 130.4 (d, *J* = 3.7 Hz), 128.9 (d, *J* = 12.6 Hz), 125.1 (d, *J* = 3.0 Hz), 122.4, 120.8, 117.4, 115.9 (d, *J* = 21.9 Hz), 109.3 (d, *J* = 1.8 Hz), 96.4, 59.8, 50.9 (d, *J* = 2.6 Hz), 19.1, 14.3.

***Ethyl 4-(2-chlorophenyl)-2-methyl-1,4-dihydrobenzo[4,5]imidazo[1,2-*a*]pyrimidine-3-carboxylate<sup>2</sup>***

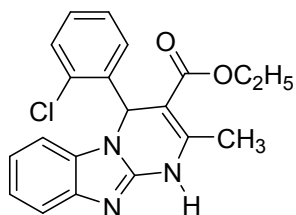

**mp** 290-291 °C

**<sup>1</sup>H NMR (500 MHz, DMSO-*d*<sub>6</sub>)** δ 7.45 (d, *J* = 7.5 Hz, 1H), 7.40 – 7.32 (m, 2H), 7.30 – 7.18 (m, 3H), 7.06 – 7.02 (m, 1H), 6.95 (m, 1H), 6.75 (s, 1H), 4.10 – 3.88 (m, 2H), 2.46 (s, 3H), 1.08 (t, *J* = 7.0 Hz, 3H).

**<sup>13</sup>C NMR (125 MHz, DMSO-*d*<sub>6</sub>)** δ 165.5, 147.8, 145.7, 142.2, 139.3, 132.2, 132.1, 131.0, 130.1, 130.0, 128.3, 122.4, 120.8, 117.4, 109.7, 96.8, 67.4, 59.8, 19.1, 14.5.

***Ethyl 2-methyl-4-(2-nitrophenyl)-1,4-dihydrobenzo[4,5]imidazo[1,2-*a*]pyrimidine-3-carboxylate<sup>4</sup>***

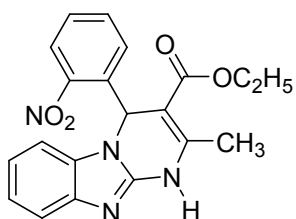

**mp** 286-288 °C

**<sup>1</sup>H NMR (500 MHz, DMSO-*d*<sub>6</sub>)** δ 7.91 (dd, *J* = 8.0, 1.0 Hz, 1H), 7.59 – 7.54 (m, 1H), 7.43 (m, 3H), 7.26 (dd, *J* = 8.0, 1.0 Hz, 1H), 7.11 (s, 1H), 7.10 – 7.07 (m, 1H), 7.00 – 6.95 (m, 1H), 4.03 – 3.97 (m, 1H), 3.94 – 3.88 (m, 1H), 2.42 (s, 3H), 1.05 (t, *J* = 7.0 Hz, 3H).

<sup>13</sup>C NMR (125 MHz, DMSO-*d*<sub>6</sub>) δ 165.4, 148.3, 147.8, 145.9, 137.3, 134.7, 134.7, 132.2, 129.7, 129.5, 124.5, 122.7, 121.3, 117.6, 110.0, 97.9, 60.1, 51.1, 19.4, 14.5.

**Ethyl 4-(benzo[d][1,3]dioxol-5-yl)-2-methyl-1,4-dihydrobenzo[4,5]imidazo[1,2-a]pyrimidine-3-carboxylate<sup>5</sup>**

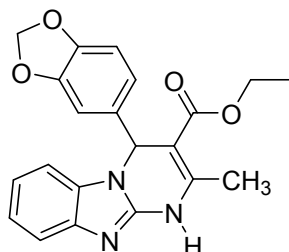

**mp** 245 - 247 °C

<sup>1</sup>H NMR (500 MHz, DMSO-*d*<sub>6</sub>) δ 7.34 (d, *J* = 7.8 Hz, 1H), 7.31 (d, *J* = 7.8 Hz, 1H), 7.04 (t, *J* = 7.6 Hz, 1H), 6.97 (t, *J* = 7.6 Hz, 1H), 6.89 – 6.83 (m, 2H), 6.78 (d, *J* = 8.0 Hz, 1H), 6.36 (s, 1H), 5.92 (d, *J* = 6.5 Hz, 2H), 4.13 – 3.94 (m, 2H), 2.44 (s, 3H), 1.16 (t, *J* = 7.1 Hz, 3H).

<sup>13</sup>C NMR (125 MHz, DMSO-*d*<sub>6</sub>) δ 165.7, 147.7, 147.1, 146.8, 146.0, 136.5, 132.0, 122.2, 121.1, 120.6, 117.2, 115.2, 110.5, 108.4, 107.8, 101.5, 98.5, 59.8, 56.1, 19.0, 14.6.

**1-(2-methyl-4-phenyl-1,4-dihydrobenzo[4,5]imidazo[1,2-a]pyrimidin-3-yl)ethan-1-one<sup>6</sup>**

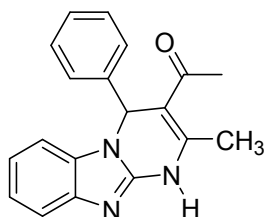

**mp** 329-330 °C

<sup>1</sup>H NMR (500 MHz, DMSO-*d*<sub>6</sub>) δ 7.39 (m, 3H), 7.33 (d, *J* = 8.0 Hz, 1H), 7.26 (t, *J* = 7.5 Hz, 1H), 7.17 (dd, *J* = 13.4, 6.0 Hz, 1H), 7.07 – 7.02 (t, *J* = 7.3 Hz, 1H), 7.01 – 6.95 (t, *J* = 7.3 Hz, 1H), 6.56 (s, 1H), 2.47 (s, 1H), 2.22 (s, 1H).

***1-(2-methyl-4-(4-nitrophenyl)-1,4-dihydrobenzo[4,5]imidazo[1,2-a]pyrimidin-3-yl)ethan-1-one***<sup>7</sup>

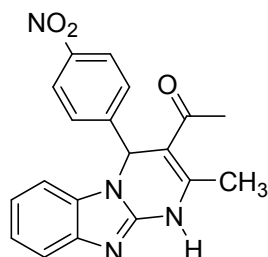

**mp** 304 - 305 °C

**<sup>1</sup>H NMR (500 MHz, DMSO-*d*<sub>6</sub>)** δ 8.12 (m, 2H), 7.66 (m, 2H), 7.37 (t, *J* = 7.0 Hz, 2H), 7.10 – 7.02 (m, 1H), 6.99 - 6.96 (m, 1H), 6.70 (s, 1H), 2.51 (s, 1H), 2.28 (s, 1H)

**<sup>13</sup>C NMR (125 MHz, DMSO-*d*<sub>6</sub>)** δ 194.6, 149.1, 147.8, 147.4, 145.6, 142.5, 131.8, 128.9, 128.9, 124.2, 124.2, 122.7, 121.2, 117.5, 110.3, 109.0, 55.5, 31.4, 20.4

***1-(4-(2-chlorophenyl)-2-methyl-1,4-dihydrobenzo[4,5]imidazo[1,2-a]pyrimidin-3-yl)ethan-1-one***<sup>7</sup>

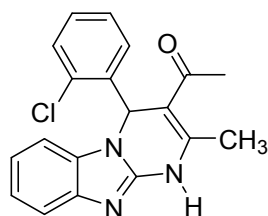

**mp** 291-292 °C

**<sup>1</sup>H NMR (500 MHz, DMSO-*d*<sub>6</sub>)** δ 7.47 (d, *J* = 7.5 Hz, 1H), 7.35 (m, 2H), 7.28 - 7.25 (m, 2H), 7.21 (td, *J* = 7.7, 1.4 Hz, 1H), 7.05 (t, *J* = 7.5 Hz, 1H), 6.97 (t, *J* = 7.5 Hz, 1H), 6.81 (s, 1H), 2.48 (s, 3H), 2.24 (s, 3H).

**<sup>13</sup>C NMR (125 MHz, DMSO-*d*<sub>6</sub>)** δ 194.6, 146.6, 145.7, 142.4, 139.1, 132.2, 132.0, 131.1, 130.2, 130.1, 128.3, 122.5, 120.9, 117.4, 109.9, 108.8, 54.5, 31.4, 20.3.

***1-(2-methyl-4-(2-nitrophenyl)-1,4-dihydrobenzo[4,5]imidazo[1,2-a]pyrimidin-3-yl)ethan-1-one***<sup>7</sup>

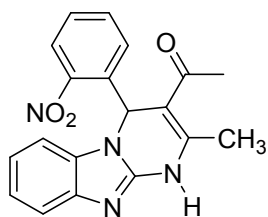

**mp** 305-306 °C

**<sup>1</sup>H NMR (500 MHz, DMSO-*d*<sub>6</sub>)** δ 7.82 (d, *J* = 8.0 Hz, 1H), 7.51 - 7.47 (m, 2H), 7.45 - 7.35 (m, 2H), 7.14 (d, *J* = 8.0 Hz, 1H), 7.09 (t, *J* = 7.5 Hz, 1H), 7.05 (s, 1H), 6.99 (t, *J* = 7.5 Hz, 1H), 2.49 (s, 3H), 2.25 (s, 3H).

**<sup>13</sup>C NMR (125 MHz, DMSO-*d*<sub>6</sub>)** δ 194.2, 148.8, 147.4, 145.9, 142.6, 137.3, 134.1, 132.4, 129.2, 128.9, 124.1, 122.7, 121.3, 117.6, 110.7, 110.1, 51.2, 31.9, 31.1, 20.6.

***1-(4-(4-methoxyphenyl)-2-methyl-1,4-dihydrobenzo[4,5]imidazo[1,2-a]pyrimidin-3-yl)ethan-1-one***<sup>2</sup>

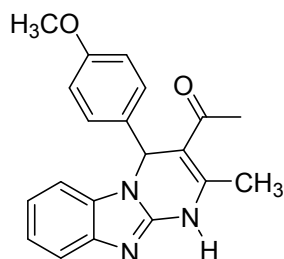

**mp** 276-278 °C

**<sup>1</sup>H NMR (500 MHz, DMSO-*d*<sub>6</sub>)** δ 7.41 (d, *J* = 7.5 Hz, 1H), 7.35 - 7.31 (m, 3H), 7.04 (td, *J* = 7.5, 1.1 Hz, 1H), 6.98 (td, *J* = 7.5, 1.1 Hz, 1H), 6.85 - 6.77 (m, 2H), 6.55 (s, 1H), 3.65 (s, 3H), 2.46 (s, 3H), 2.20 (s, 3H).

**<sup>13</sup>C NMR (125 MHz, DMSO-*d*<sub>6</sub>)** δ 194.9, 159.2, 146.3, 145.9, 142.8, 134.2, 132.1, 128.9, 128.9, 122.2, 120.6, 117.3, 114.3, 114.3, 110.5, 109.2, 55.6, 55.5, 31.0, 20.1.

**1-(4-(4-fluorophenyl)-2-methyl-1,4-dihydrobenzo[4,5]imidazo[1,2-a]pyrimidin-3-yl)ethan-1-one<sup>7</sup>**

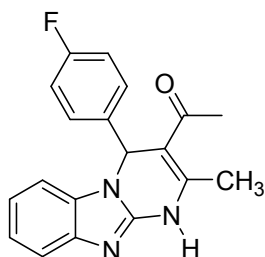

**mp 319-322 °C**

**<sup>1</sup>H NMR (500 MHz, DMSO-*d*<sub>6</sub>)**  $\delta$  7.47 – 7.41 (m, 2H), 7.40 (d, *J* = 7.8 Hz, 1H), 7.34 (d, *J* = 7.8 Hz, 1H), 7.10 – 7.03 (m, 3H), 7.01 – 6.97 (m, 1H), 6.60 (s, 1H), 2.48 (s, 3H), 2.23 (s, 3H).

**<sup>13</sup>C NMR (125 MHz, DMSO-*d*<sub>6</sub>)**  $\delta$  194.6, 161.9 (d, *J* = 244.2 Hz), 146.8, 145.9, 142.7, 138.5, 131.9, 129.7, 129.7, 122.3, 120.7, 117.4, 115.9, 115.7, 110.4, 109.2, 55.4, 31.2, 20.2.

**1-(4-(4-chlorophenyl)-2-methyl-1,4-dihydrobenzo[4,5]imidazo[1,2-a]pyrimidin-3-yl)ethan-1-one<sup>2</sup>**

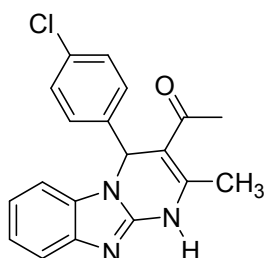

**<sup>1</sup>H NMR (500 MHz, DMSO-*d*<sub>6</sub>)**  $\delta$  7.43 – 7.39 (m, 2H), 7.39 – 7.35 (m, 2H), 7.32 – 7.31 (m, 2H), 7.09 – 7.03 (m, 1H), 7.01 – 6.96 (m, 1H), 6.57 (s, 1H), 2.47 (s, 3H), 2.23 (s, 3H).

**<sup>13</sup>C NMR (125 MHz, DMSO-*d*<sub>6</sub>)**  $\delta$  194.6, 147.0, 145.8, 142.6, 141.1, 132.9, 131.9, 129.5, 129.5, 129.0, 129.0, 122.4, 120.9, 117.4, 110.4, 109.1, 88.6, 55.4, 31.3, 20.2.

**1-(4-(3-chlorophenyl)-2-methyl-1,4-dihydrobenzo[4,5]imidazo[1,2-a]pyrimidin-3-yl)ethan-1-one<sup>7</sup>**



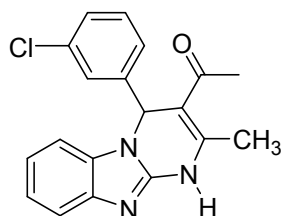

**<sup>1</sup>H NMR (500 MHz, DMSO-*d*<sub>6</sub>)**  $\delta$  10.76 (s, 1H), 7.46 (d, *J* = 7.7 Hz, 1H), 7.34 (d, *J* = 7.7 Hz, 1H), 7.07 – 7.03 (m, 1H), 7.01 (m, 1H), 6.94 (s, 1H), 6.79 (d, *J* = 8.3 Hz, 1H), 6.53 (s, 1H), 5.93 (d, *J* = 8.3 Hz, 2H), 2.47 (s, 3H), 2.23 (s, 3H).

**<sup>13</sup>C NMR (125 MHz, DMSO-*d*<sub>6</sub>)**  $\delta$  194.7, 147.9, 147.3, 145.9, 142.8, 136.0, 132.1, 122.2, 121.2, 120.6, 117.3, 110.7, 109.1, 108.5, 108.0, 101.6, 55.9, 31.1, 20.2.

**1-(4-(2-fluorophenyl)-2-methyl-1,4-dihydrobenzo[4,5]imidazo[1,2-a]pyrimidin-3-yl)ethan-1-one<sup>7</sup>**

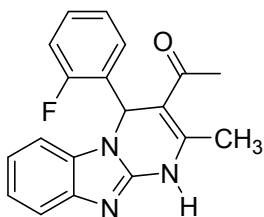

**<sup>1</sup>H NMR (500 MHz, DMSO-*d*<sub>6</sub>)**  $\delta$  10.89 (s, 1H), 7.48 (td, *J* = 7.8, 1.7 Hz, 1H), 7.35 (d, *J* = 8.0 Hz, 1H), 7.28 – 7.24 (m, 1H), 7.22 (d, *J* = 8.0 Hz, 1H), 7.15 – 7.08 (m, 2H), 7.08 – 7.04 (m, 1H), 7.02 – 6.97 (m, 1H), 2.49 (s, 3H), 2.24 (s, 3H).

**<sup>13</sup>C NMR (125 MHz, DMSO-*d*<sub>6</sub>)**  $\delta$  194.2, 145.8, 142.7, 132.0, 130.6 (d, *J* = 34.5 Hz), 130.4 (d, *J* = 15.5 Hz), 128.8, 128.7, 125.3 (d, *J* = 13.5 Hz), 122.4, 120.8, 117.5, 116.1 (d, *J* = 87.0 Hz), 109.5 (d, *J* = 13.5 Hz), 107.9, 51.0 (d, *J* = 10.0 Hz), 31.2, 20.3.

## Section S4. General procedure and spectral data of 2,3-dihydroquinazolin-4(1H)-one

### General procedure for 2,3-dihydroquinazolin-4(1H)-one

A mixture of anthranilamide (136 mg, 1 mmol), benzaldehyde (106 mg, 1 mmol), and [(4-SO<sub>3</sub>H)BMIM]HSO<sub>4</sub> (31.6 mg, 0.1 mmol) was sonicated for 30 min at room temperature and the process of reaction monitored by TLC or GC-MS. After completion of the conversion, the reaction mixture was quenched with ethanol (10 mL). The crude product was filtered and washed with petroleum ether (2 x 5 mL) and then purified by recrystallization from ethanol to obtain the desired product.

### Spectral data of 2,3-dihydroquinazolin-4(1H)-one

#### 2-phenyl-2,3-dihydroquinazolin-4(1H)-one<sup>8</sup>

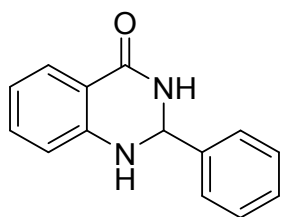

White solid; **mp** 219- 223 °C

**FT-IR (KBr, 4000 – 400 cm<sup>-1</sup>):** 3462, 3306, 2900, 1659, 1615, 1509, 1483, 1443, 1387, 1298, 1247, 1159, 1028.

**<sup>1</sup>H NMR (500 MHz, DMSO-*d*<sub>6</sub>):** δ 8.28 (s, 1H), 7.61 (d, *J* = 8.0 Hz, 1H), 7.49 (d, *J* = 7.0 Hz, 2H), 7.40 - 7.33 (m, 3H), 7.24 (td, *J* = 7.5 Hz, *J* = 1.5 Hz, 1H), 7.10 (s, 1H), 6.74 (d, *J* = 8.0 Hz, 1H), 6.67 (t, *J* = 7.5 Hz, 1H), 5.75 (s, 1H).

**<sup>13</sup>C NMR (125 MHz, DMSO-*d*<sub>6</sub>):** δ 163.6, 147.8, 141.62, 133.3, 128.3, 127.3, 126.8, 117.1, 114.9, 114.37, 66.5.

#### 2-(4-chlorophenyl)-2,3-dihydroquinazolin-4(1H)-one<sup>9</sup>

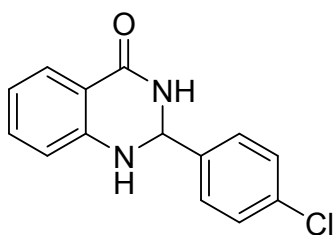

White solid; **mp** 199- 201 °C

**FT-IR (KBr, 4000 – 400 cm<sup>-1</sup>):** 3447, 3305, 3188, 3062, 2950, 1914, 1659, 1607, 1481, 1431, 1381, 1288, 1161, 1089, 1010.

**<sup>1</sup>H NMR (500 MHz, DMSO-*d*<sub>6</sub>):** δ 8.32 (s, 1H), 7.60 (d, *J* = 7.5 Hz, 1H), 7.50 (d, *J* = 8.0 Hz, 2H), 7.45 (d, *J* = 8.5 Hz, 2H), 7.24 (t, *J* = 7.2 Hz, 1H), 7.13 (s, 1H), 6.74 (d, *J* = 8.0 Hz, 1H), 6.67 (t, *J* = 7.5 Hz, 1H), 5.76 (s, 1H).

**<sup>13</sup>C NMR (125 MHz, DMSO-*d*<sub>6</sub>):** δ 163.3, 147.5, 140.5, 133.3, 132.8, 128.6, 128.1, 127.2, 117.1, 114.8, 114.3, 65.6.

***2-(4-hydroxyphenyl)-2,3-dihydroquinazolin-4(1H)-one*<sup>11</sup>**

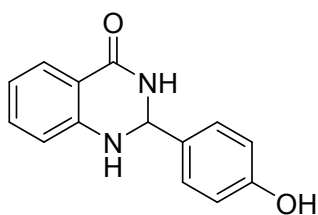

White solid; **mp** 212- 214 °C

**FT-IR (KBr, 4000 – 400 cm<sup>-1</sup>):** 3338, 3189, 2782, 2582, 1627, 1499, 1426, 1292, 1244, 1152, 1037.

**<sup>1</sup>H NMR (500 MHz, DMSO-*d*<sub>6</sub>):** δ 9.49 (s, 1H), 8.08 (s, 1H), 7.59 (d, *J* = 7.5 Hz, 1H), 7.29 (d, *J* = 8.5 Hz, 2H), 7.24 – 7.19 (m, 1H), 6.93 (s, 1H), 6.73 (m, 3H), 6.66 (t, *J* = 7.5 Hz, 1H), 5.63 (s, 1H).

**<sup>13</sup>C NMR (125 MHz, DMSO-*d*<sub>6</sub>):** δ 163.7, 157.7, 148.1, 133.2, 131.6, 128.3, 127.3, 117.0, 114.9, 114.4, 66.6.

***2-(*p*-tolyl)-2,3-dihydroquinazolin-4(1H)-one*<sup>9</sup>**

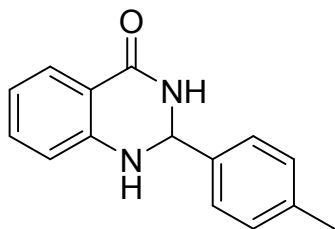

White solid; **mp** 233-234 °C

**FT-IR (KBr, 4000 – 400 cm<sup>-1</sup>):** 3443, 2900, 1661, 1510, 1438, 1384, 1294, 1160, 908.

**<sup>1</sup>H NMR (500 MHz, DMSO-*d*<sub>6</sub>):** δ 8.21 (s, 1H), 7.59 (s, 1H), 7.42 – 6.99 (m, 6H), 6.69 (s, *J* = 33.0 Hz, 2H), 5.69 (s, 1H), 2.28 (s, 3H).

**<sup>13</sup>C NMR (125 MHz, DMSO-*d*<sub>6</sub>):** δ 164.1, 148.4, 139.2, 138.2, 133.7, 129.3, 127.8, 127.3, 117.5, 115.5, 114.8, 66.8, 21.2.

***2-(4-methoxyphenyl)-2,3-dihydroquinazolin-4(1H)-one*<sup>9</sup>**

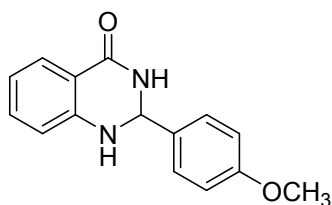

White solid; **mp:** 178- 179 °C

**FT-IR (KBr, 4000 – 400 cm<sup>-1</sup>):** 3426, 3298, 3180, 3025, 2925, 2831, 1657, 1610, 1505, 1434, 1383, 1298, 1247, 1167, 1118, 1028.

**<sup>1</sup>H NMR (500 MHz, DMSO-*d*<sub>6</sub>):** δ 8.18 (s, 1H), 7.60 (d, *J* = 7.0 Hz, 1H), 7.41 (d, *J* = 7.5 Hz, 2H), 7.23 (t, *J* = 6.7 Hz, 1H), 7.01 (s, 1H), 6.94 (d, *J* = 7.5 Hz, 2H), 6.73 (d, *J* = 8.0 Hz, 1H), 6.67 (t, *J* = 6.7 Hz, 1H), 5.70 (s, 1H), 3.74 (s, 3H).

**<sup>13</sup>C NMR (125 MHz, DMSO-*d*<sub>6</sub>):** δ 163.7, 159.4, 148.0, 133.5, 133.2, 128.2, 127.3, 117.1, 115.0, 114.4, 113.6, 66.3, 55.2.

***2-cyclohexyl-2,3-dihydroquinazolin-4(1H)-one*<sup>10</sup>**

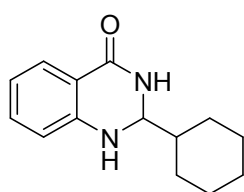

White solid ; **mp:** 202-205°C

**FT-IR (KBr, 4000 – 400 cm<sup>-1</sup>):** 3366, 3169, 3060, 2927, 2851, 1647, 1499, 1434, 1389, 1309, 1254, 1151, 1027.

**<sup>1</sup>H NMR (500 MHz, DMSO-*d*<sub>6</sub>):** δ 7.88 (s, 1H), 7.55 (d, *J* = 7.0 Hz, 1H), 7.20 (t, *J* = 7.0 Hz, 1H), 6.74 (d, *J* = 8 Hz, 1H), 6.60 (t, *J* = 7.0 Hz, 2H), 4.44 (s, 1H), 1.70-1.58 (m, 6H), 1.12 (d, *J* = 7 Hz, 5H).

**<sup>13</sup>C NMR (125 MHz, DMSO-*d*<sub>6</sub>):** δ 164.2, 148.8, 133.5, 127.7, 116.9, 115.3, 114.5, 69.0, 43.3, 27.5, 27.1, 26.4, 26.1, 26.0.

***2-(4-fluorophenyl)-2,3-dihydroquinazolin-4(1H)-one*<sup>10</sup>**

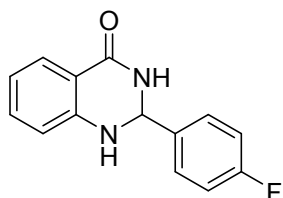

White solid ; mp 200-203 °C

**FT-IR (KBr, 4000 – 400 cm<sup>-1</sup>):** 3452, 3299, 3179, 3061, 2930, 1658, 1610, 1505, 1436, 1386, 1294, 1234, 1157.

**<sup>1</sup>H-NMR (500 MHz, DMSO-*d*<sub>6</sub>):** δ 8.27 (s, 1H), 7.61 (d, *J* = 7.5 Hz, 1H), 7.53 (dd, *J* = 8.5, 6.0 Hz, 2H), 7.27 – 7.18 (m, 3H), 7.10 (s, 1H), 6.74 (d, *J* = 8.5 Hz, 1H), 6.68 (t, *J* = 7.5 Hz, 1H), 5.77 (s, 1H).

**<sup>13</sup>C NMR (125 MHz, DMSO-*d*<sub>6</sub>):** δ 164.0, 163.5 (d, *J*=242.6 Hz), 161.6 (d, *J*=242.6 Hz), 148.3, 138.3, 135.1, 133.8, 129.5 (d, *J*= 8.4 Hz), 127.8, 117.7, 115.6 (d, *J*=21.3 Hz), 115.4 (d, *J*=21.3 Hz), 114.9, 66.4.

***2-(4-tert-butryl)phenyl-2-3-dihydroquinazolin-4(1H)-one*<sup>12</sup>**

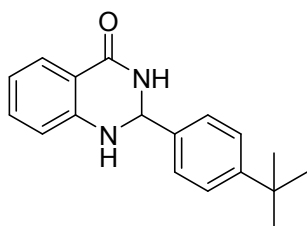

White solid; mp 181- 183 °C

**FT-IR (KBr, 4000 – 400 cm<sup>-1</sup>):** 3271, 3192, 3068, 2959, 1915, 1655, 1612, 1515, 1442, 1387, 1295, 1158, 1021.

**<sup>1</sup>H NMR (500 MHz, DMSO-*d*<sub>6</sub>):** δ 8.22 (s, 1H), 7.61 (d, *J* = 7.4 Hz, 1H), 7.42 (s, 4H), 7.23 (t, *J* = 7.2 Hz, 1H), 7.06 (s, 1H), 6.73 (d, *J* = 8.0 Hz, 1H), 6.67 (t, *J* = 7.2 Hz, 1H), 5.71 (s, 1H), 1.27 (s, 9H).

**<sup>13</sup>C NMR (125 MHz, DMSO-*d*<sub>6</sub>):** δ 164.1, 151.5, 148.4, 139.1, 133.7, 127.8, 127.2, 125.6, 117.5, 115.4, 114.8, 66.9, 34.8, 31.6.

**Section S5.** <sup>1</sup>H, <sup>13</sup>C NMR spectroscopy

**NMR spectra of benzo[4,5]imidazo[1,2-*a*]pyrimidines**

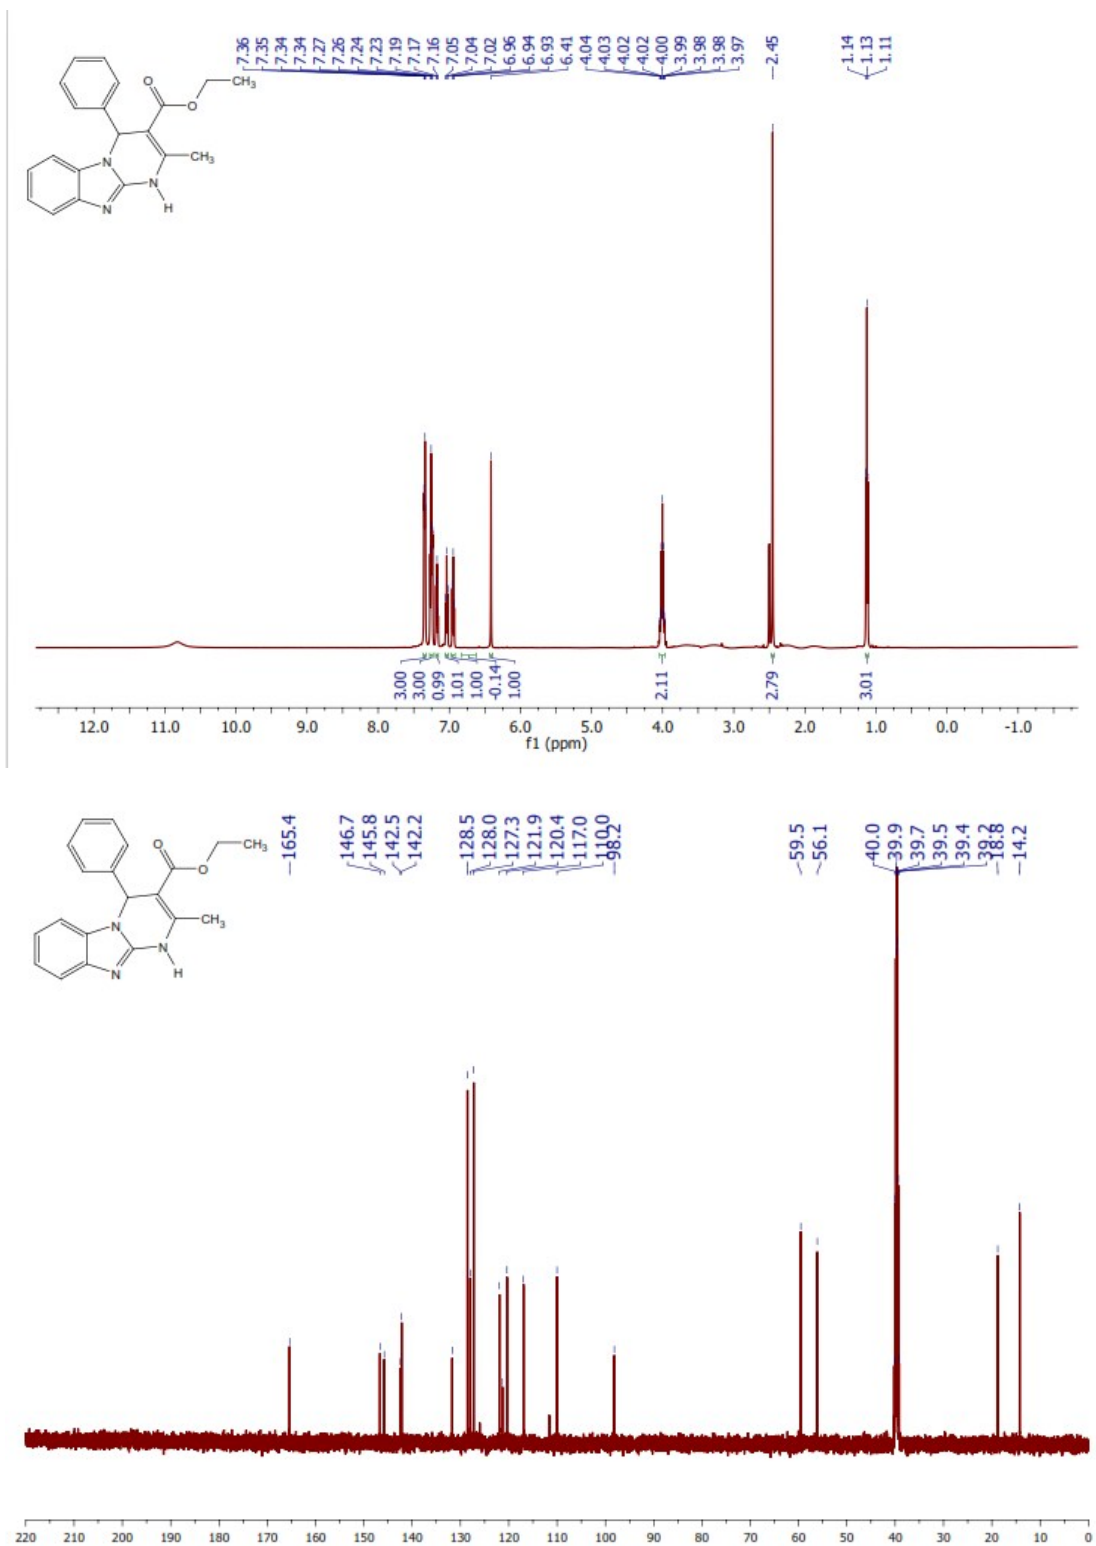

**Figure 5.** <sup>1</sup>H (top) and <sup>13</sup>C (bottom) NMR spectra of ethyl 2-methyl-4-phenyl-1,4-dihydrobenzo[4,5]imidazo[1,2-a]pyrimidine-3-carboxylate

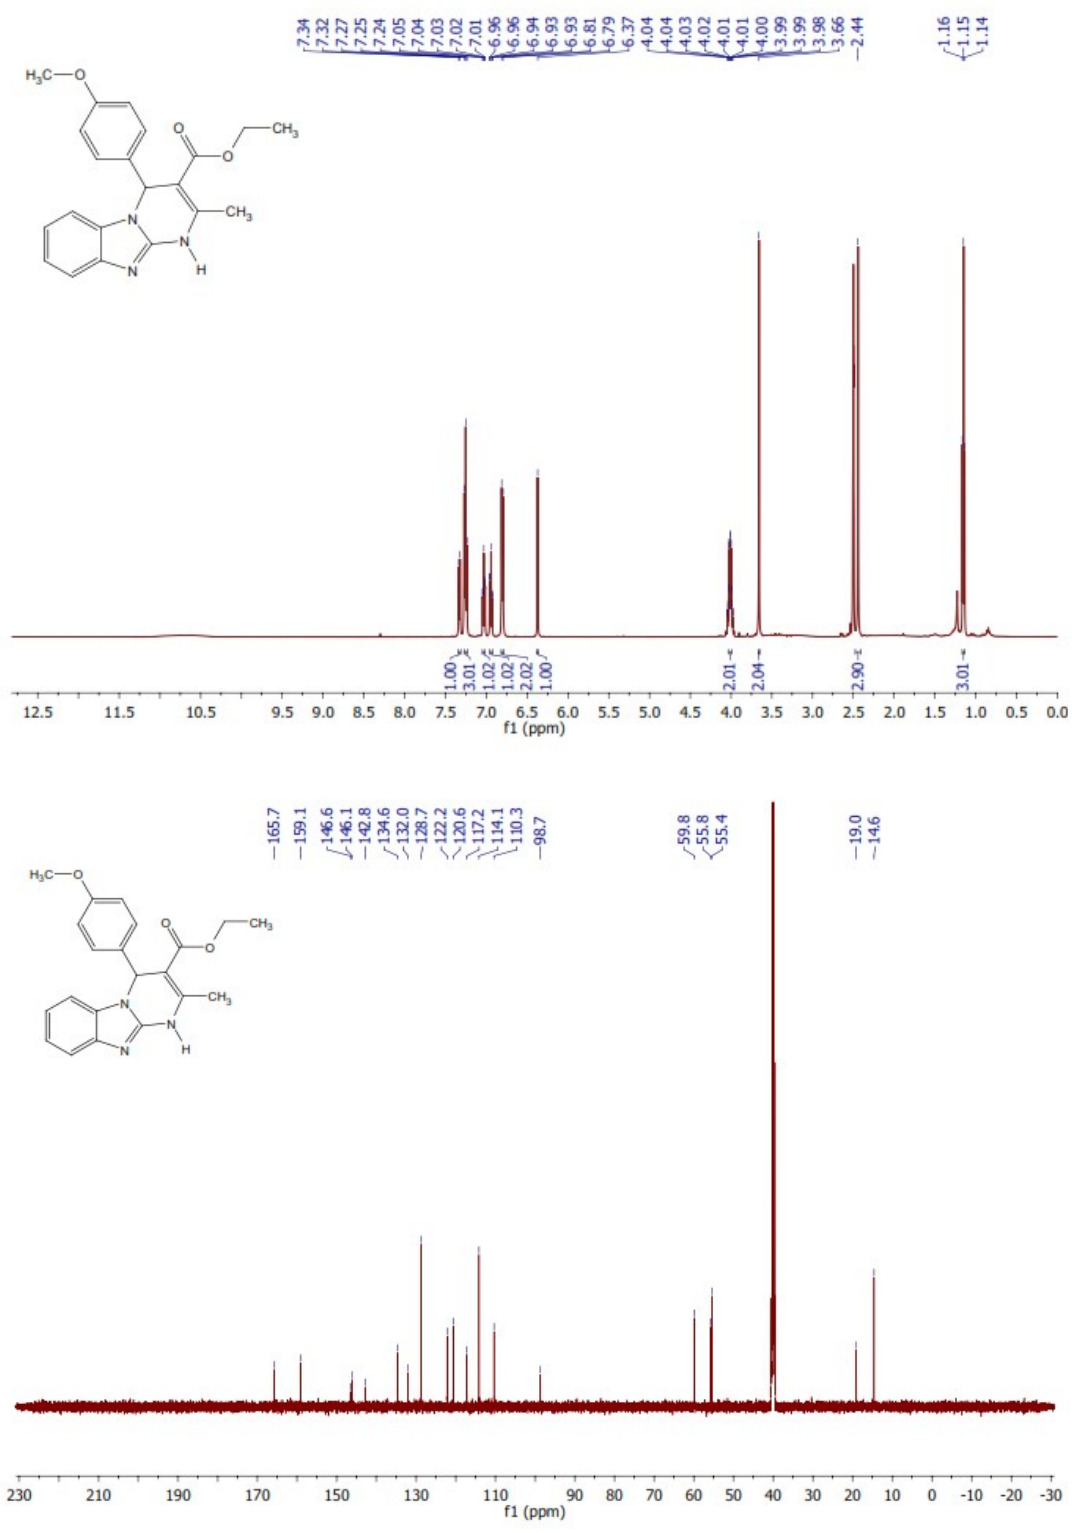

**Figure 6.** <sup>1</sup>H (top) and <sup>13</sup>C (bottom) NMR spectra of ethyl 4-(4-methoxyphenyl)-2-methyl-1,4-dihydrobenzo[4,5]imidazo[1,2-a]pyrimidine-3-carboxylate

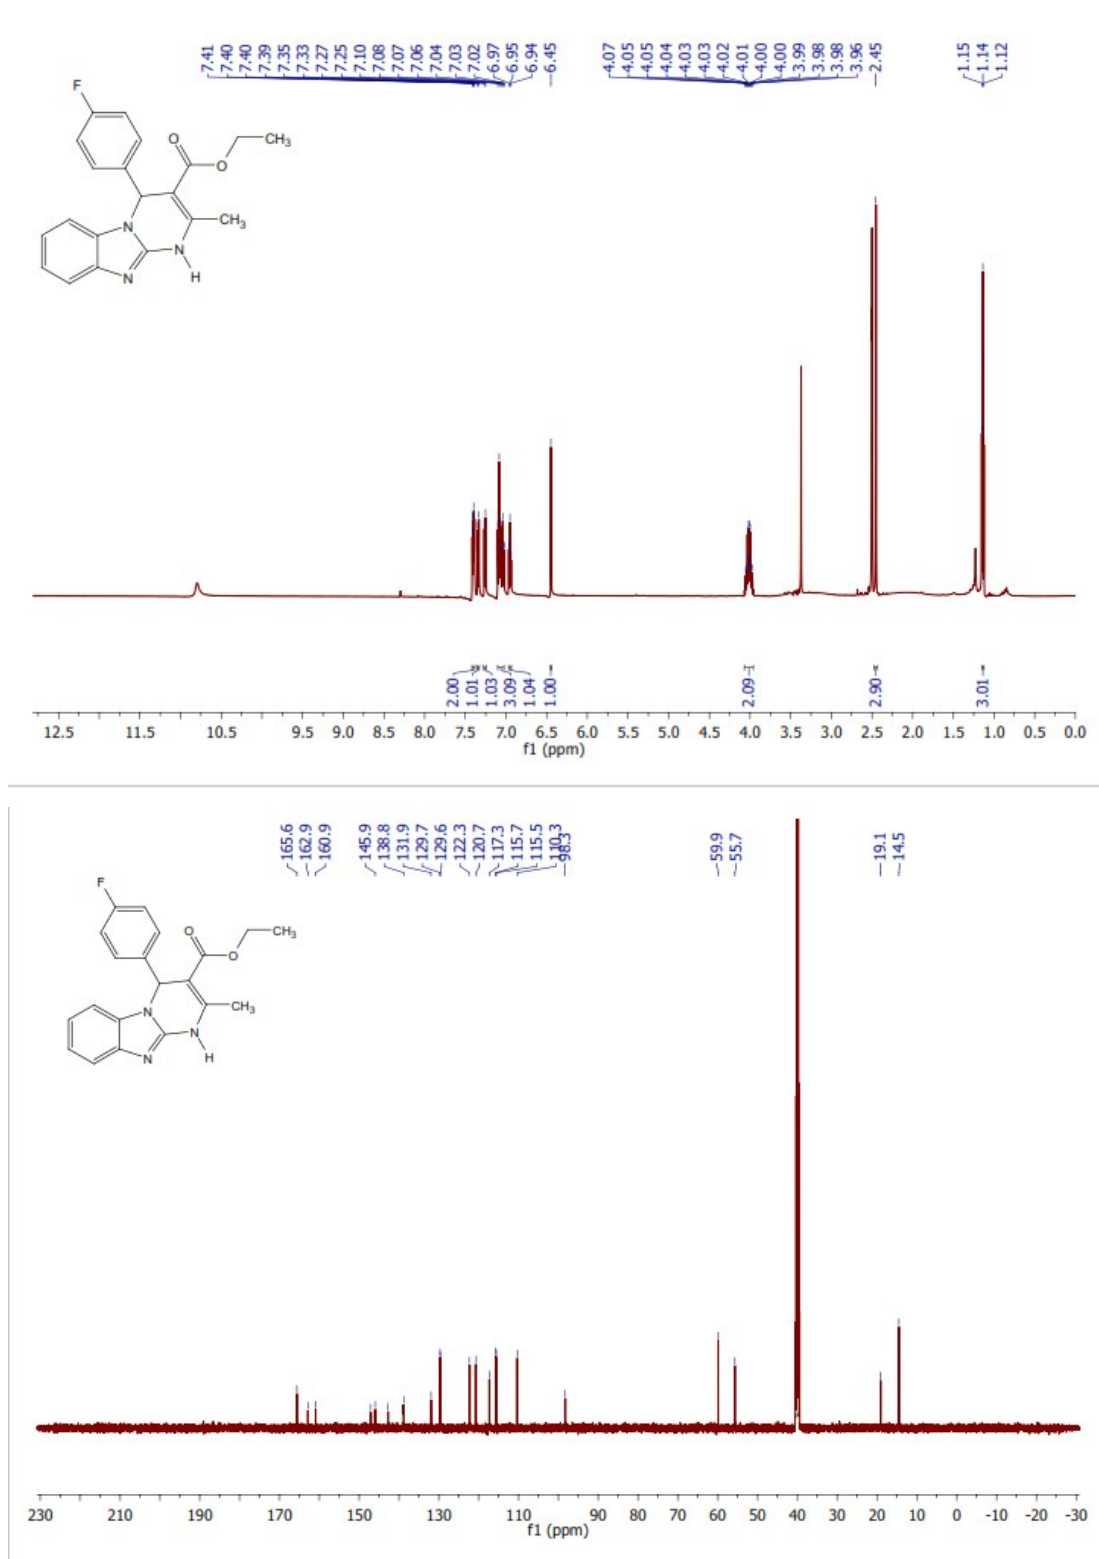

**Figure 7.** <sup>1</sup>H (top) and <sup>13</sup>C (bottom) NMR spectra of ethyl 4-(4-fluorophenyl)-2-methyl-1,4-dihydrobenzo[4,5]imidazo[1,2-a]pyrimidine-3-carboxylate



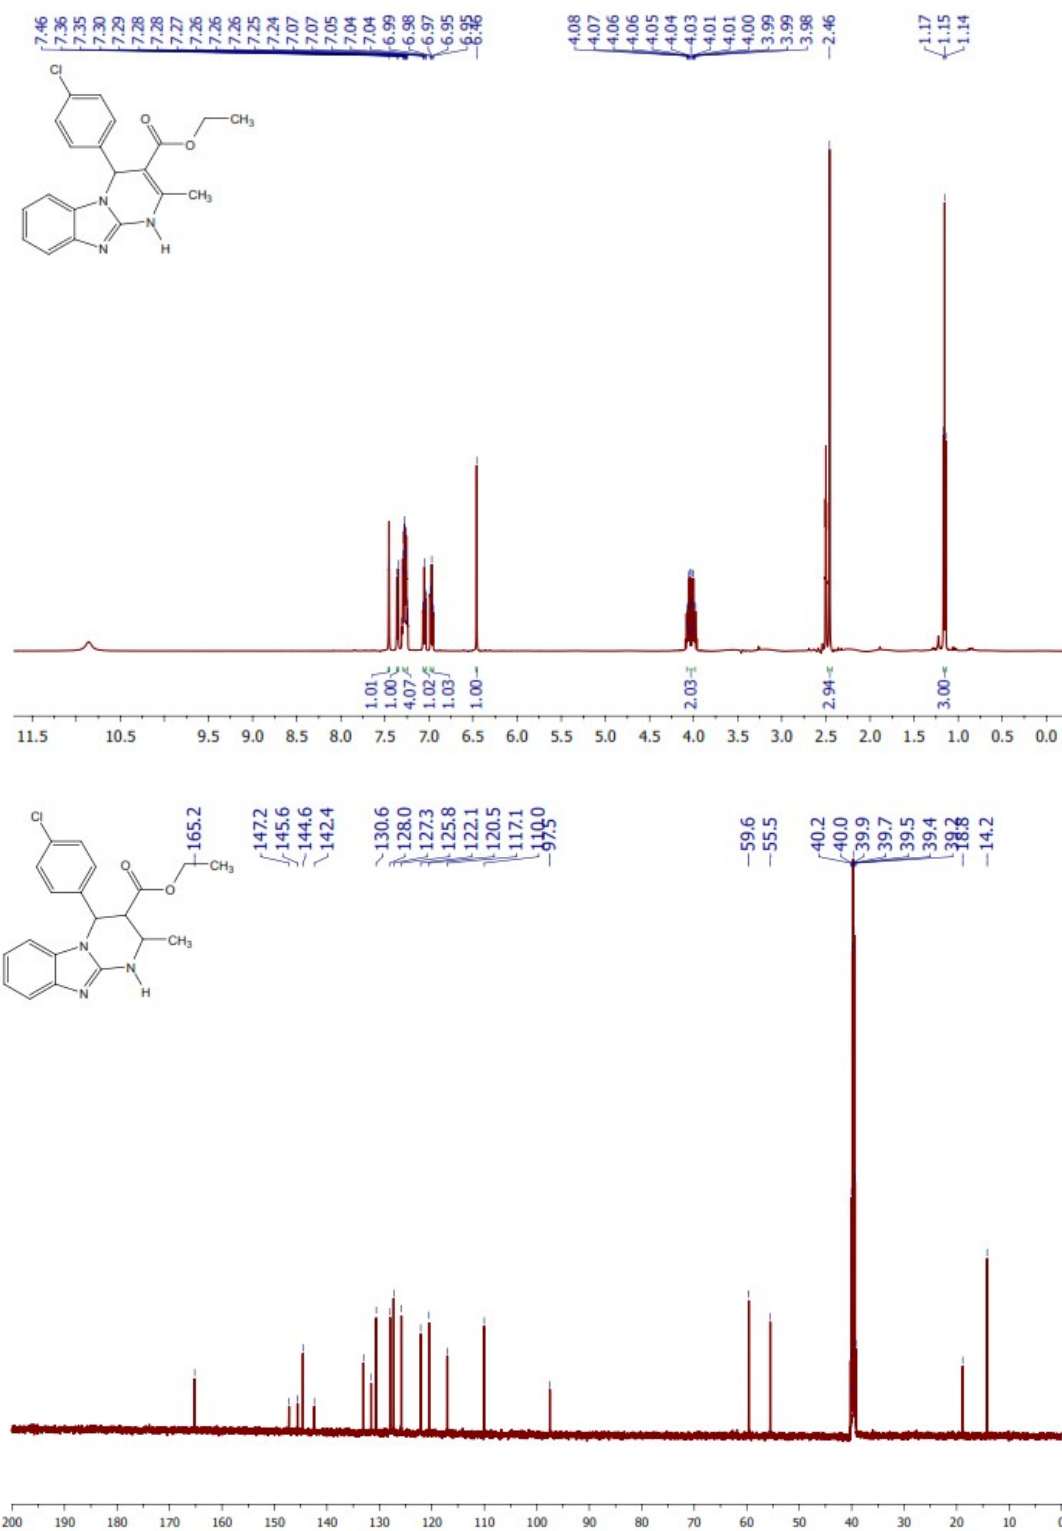

**Figure 8.**  $^1\text{H}$  (top) and  $^{13}\text{C}$  (bottom) NMR spectra of ethyl 4-(4-chlorophenyl)-2-methyl-1,4-dihydrobenzo[4,5]imidazo[1,2-a]pyrimidine-3-carboxylate

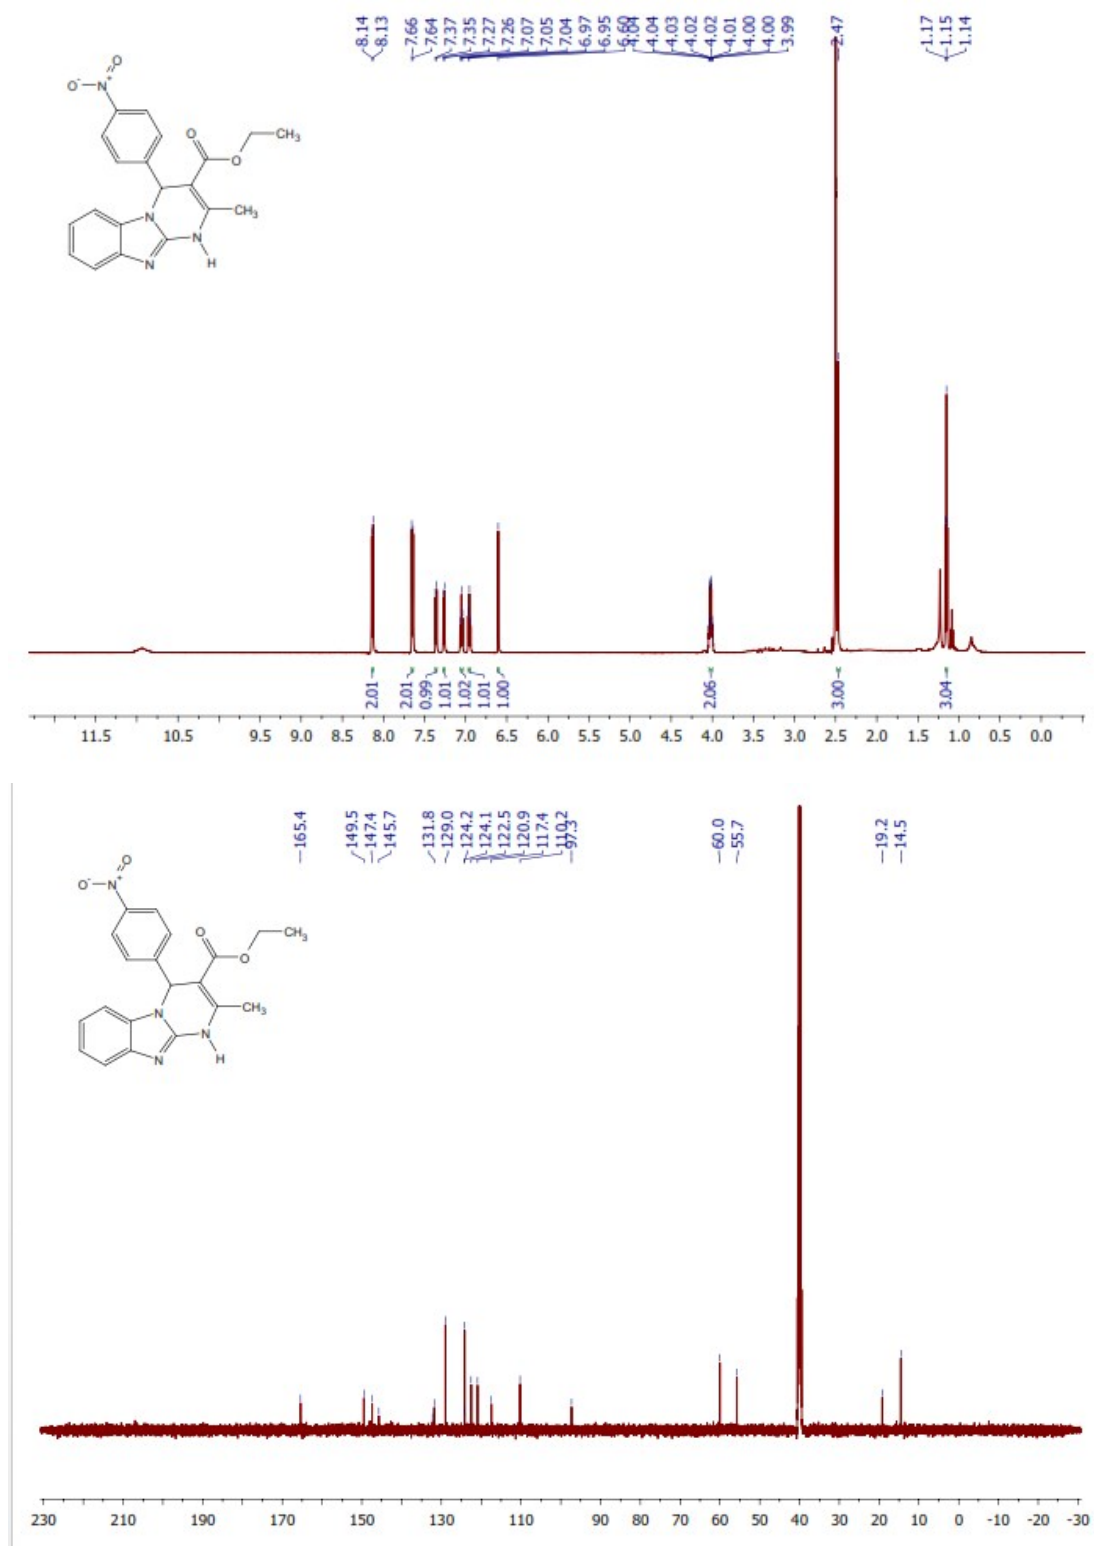

**Figure 9.**  $^1\text{H}$  (top) and  $^{13}\text{C}$  (bottom) NMR spectra of ethyl 2-methyl-4-(4-nitrophenyl)-1,4-dihydrobenzo[4,5]imidazo[1,2-a]pyrimidine-3-carboxylate

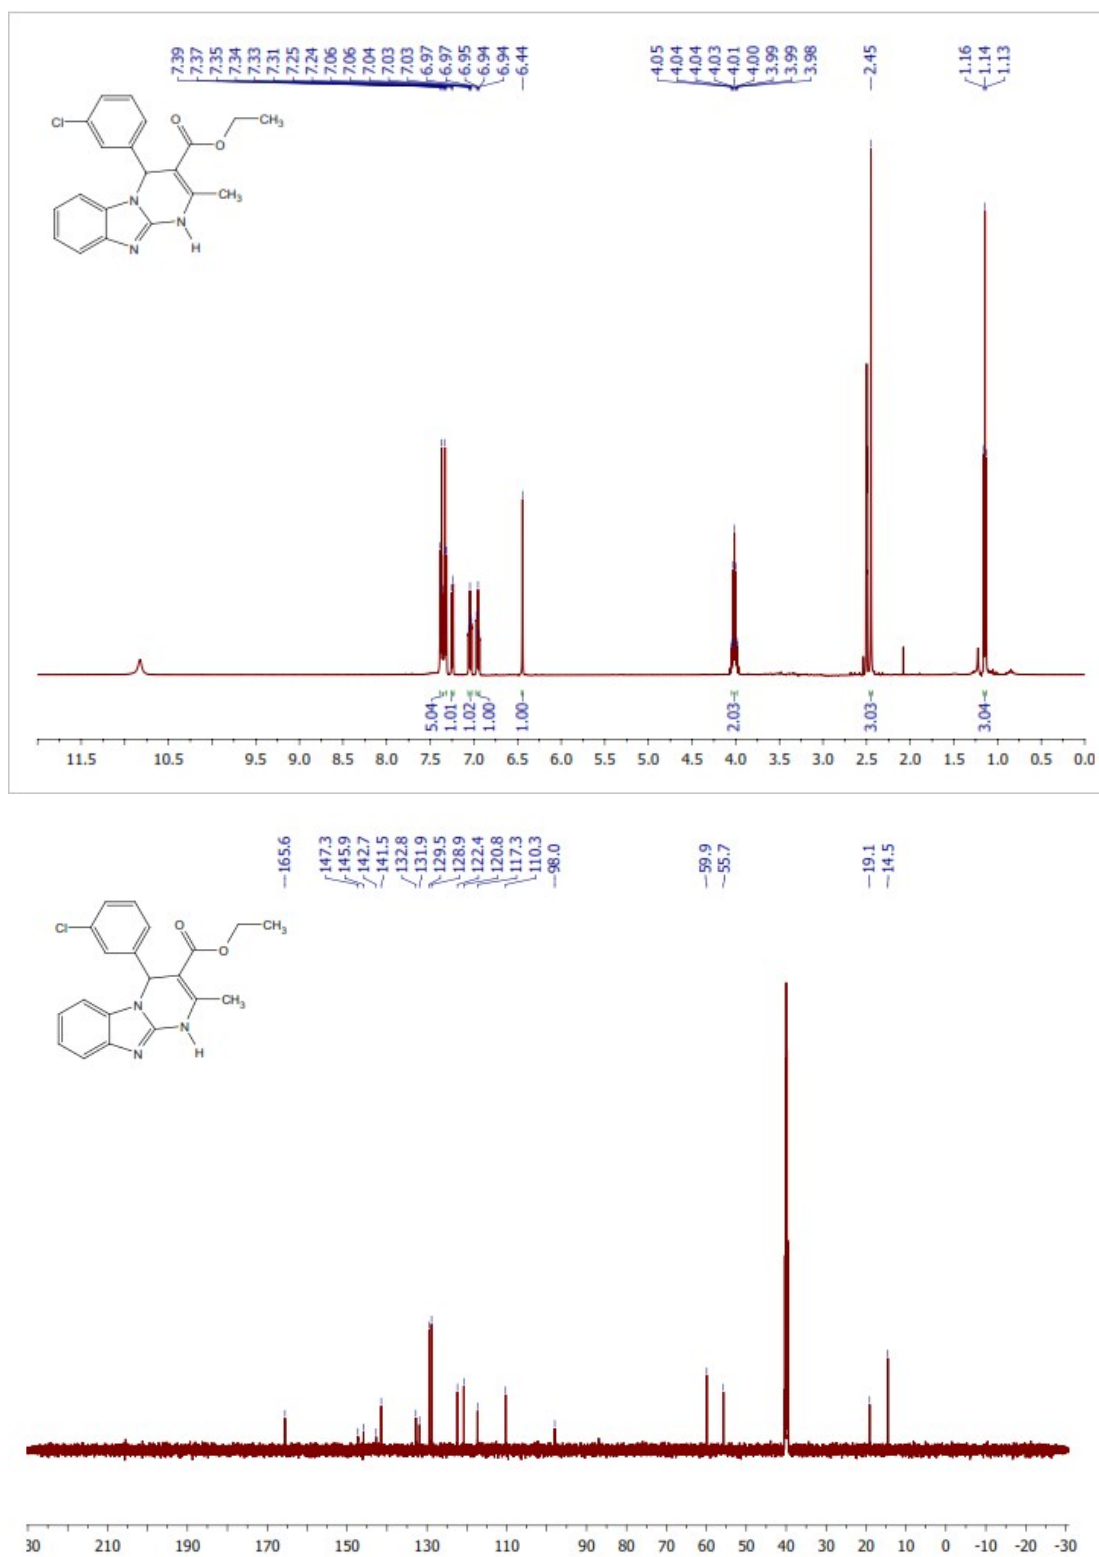

**Figure 10.** <sup>1</sup>H (top) and <sup>13</sup>C (bottom) NMR spectra of ethyl 4-(3-chlorophenyl)-2-methyl-1,4-dihydrobenzo[4,5]imidazo[1,2-a]pyrimidine-3-carboxylate

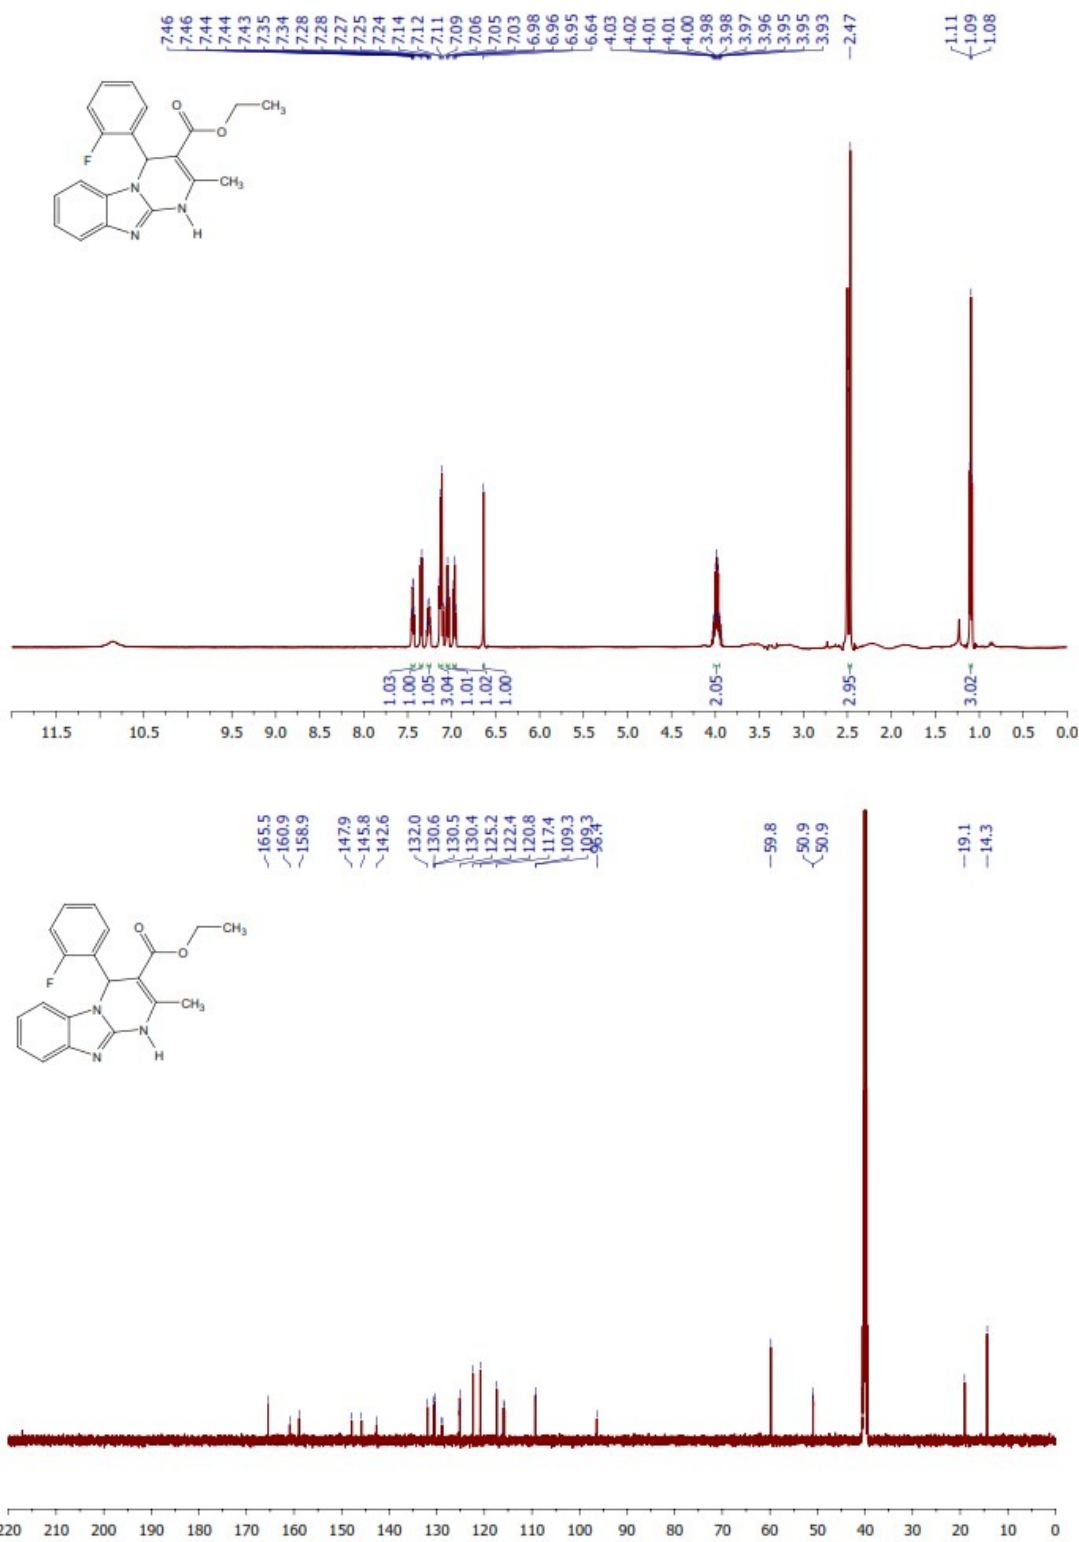

**Figure 11.**  $^1\text{H}$  (top) and  $^{13}\text{C}$  (bottom) NMR spectra of ethyl 4-(2-fluorophenyl)-2-methyl-1,4-dihydrobenzo[4,5]imidazo[1,2-a]pyrimidine-3-carboxylate

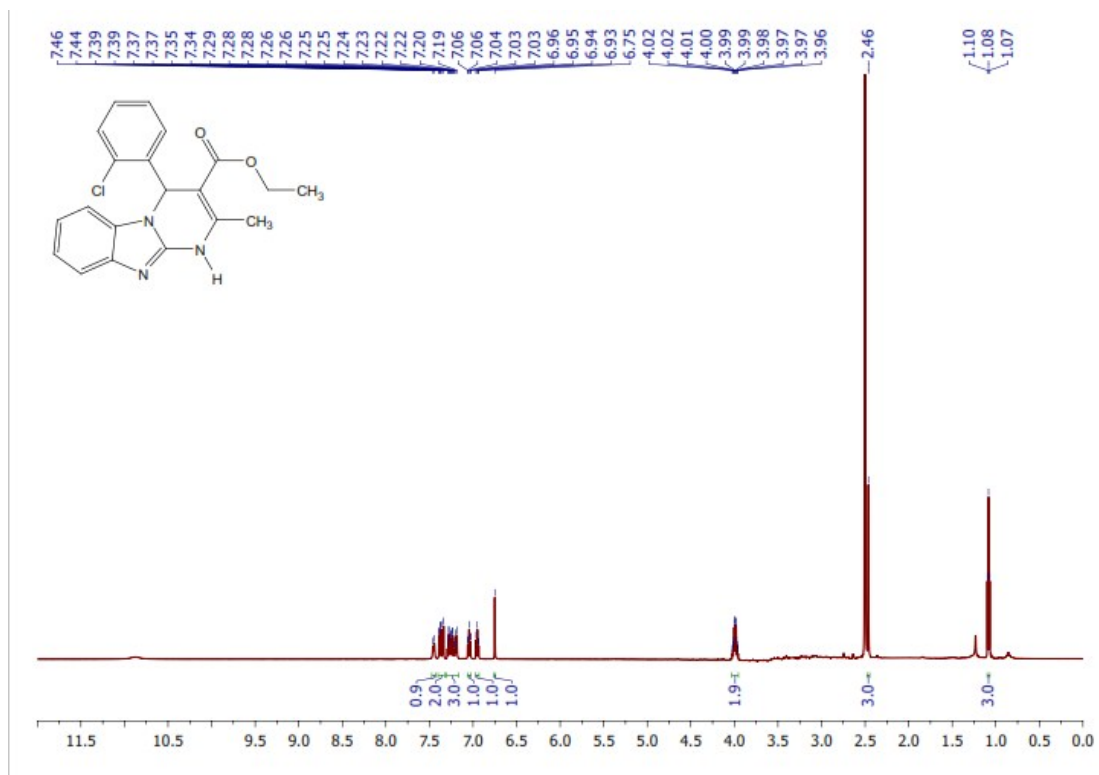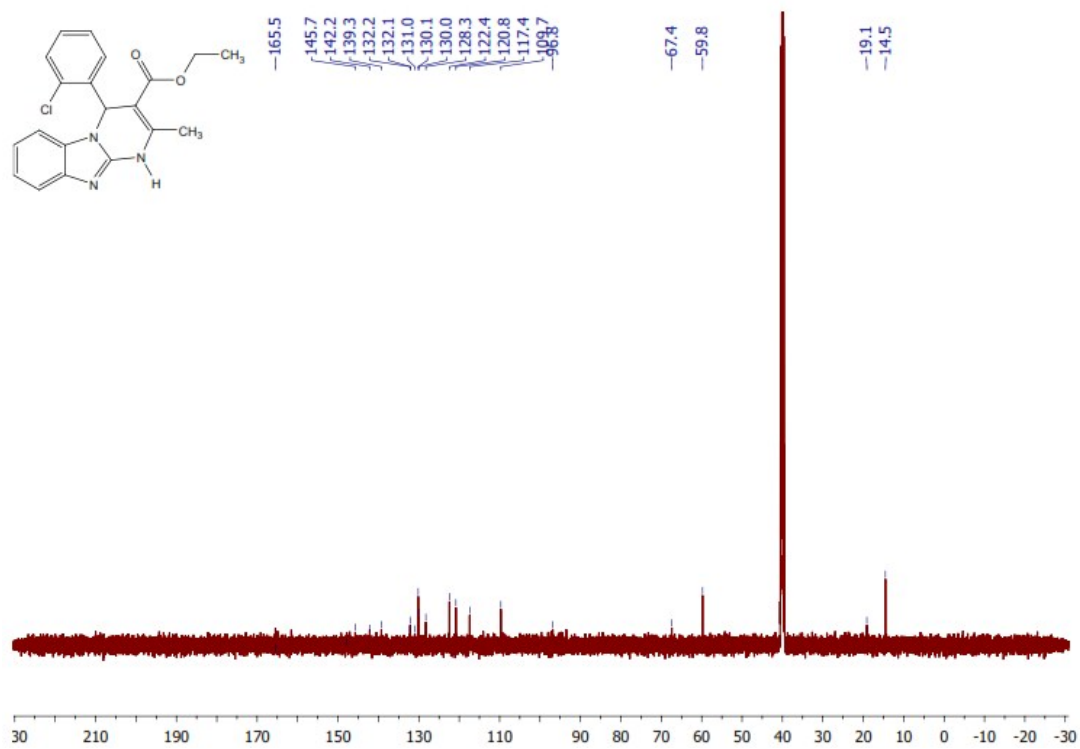

**Figure 12.** <sup>1</sup>H (top) and <sup>13</sup>C (bottom) NMR spectra of ethyl 4-(2-chlorophenyl)-2-methyl-1,4-dihydrobenzo[4,5]imidazo[1,2-a]pyrimidine-3-carboxylate

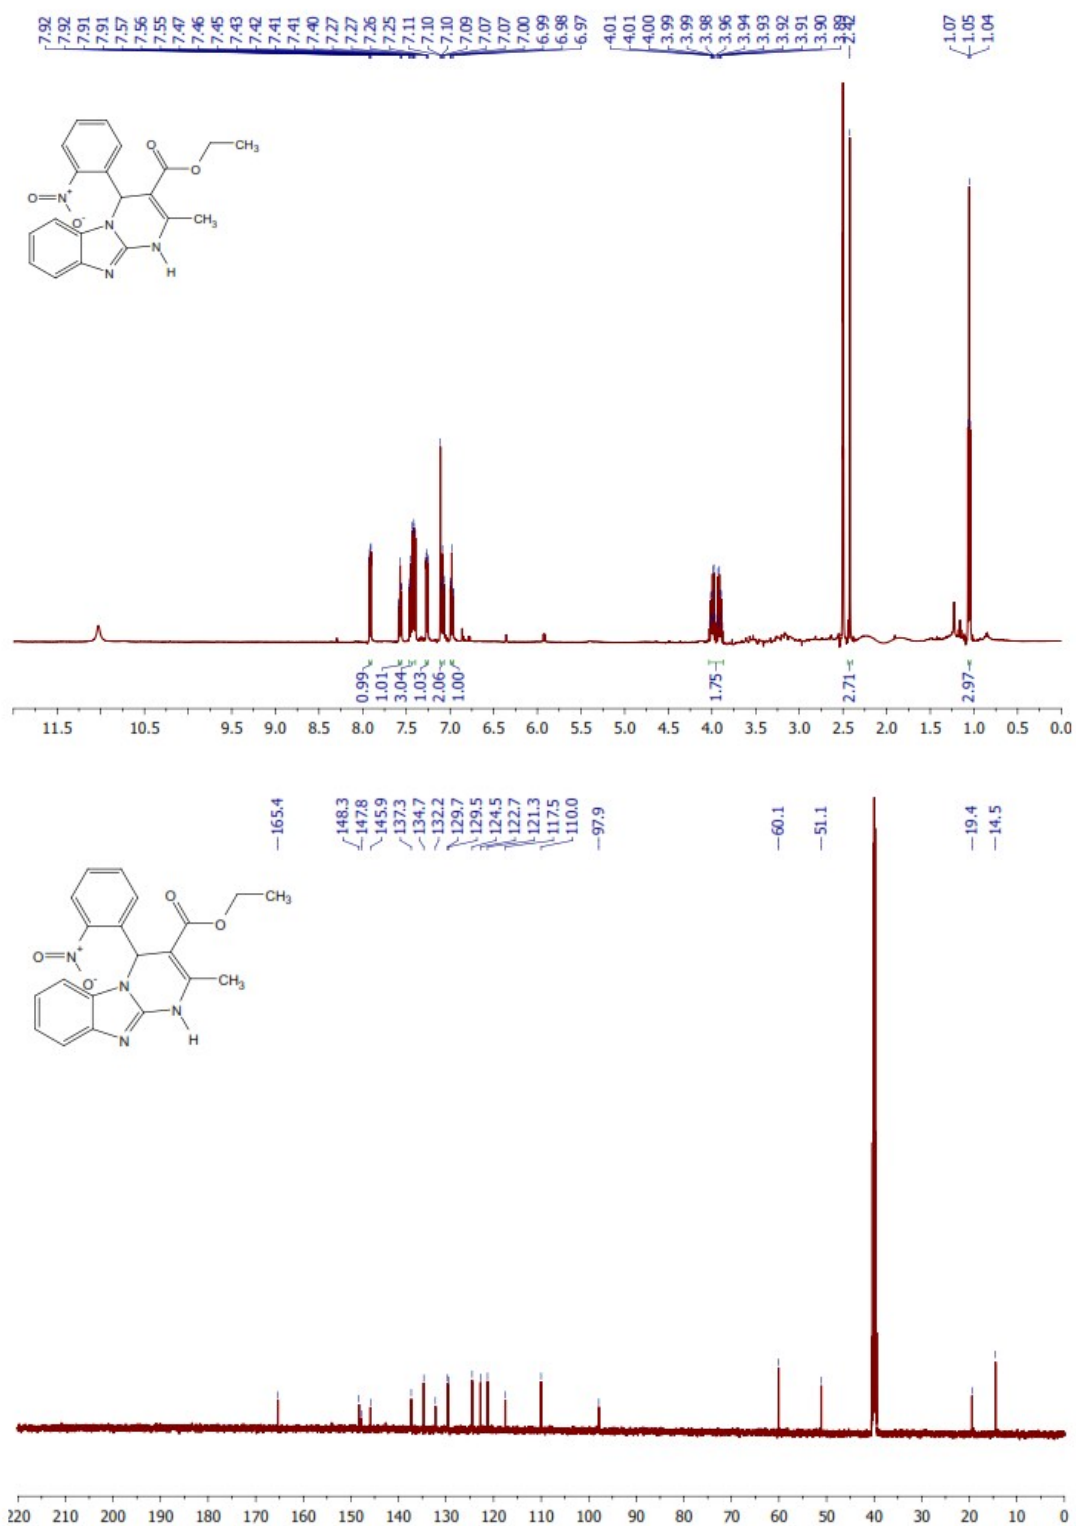

**Figure 13.** <sup>1</sup>H (top) and <sup>13</sup>C (bottom) NMR spectra of ethyl 2-methyl-4-(2-nitrophenyl)-1,4-dihydrobenzo[4,5]imidazo[1,2-a]pyrimidine-3-carboxylate

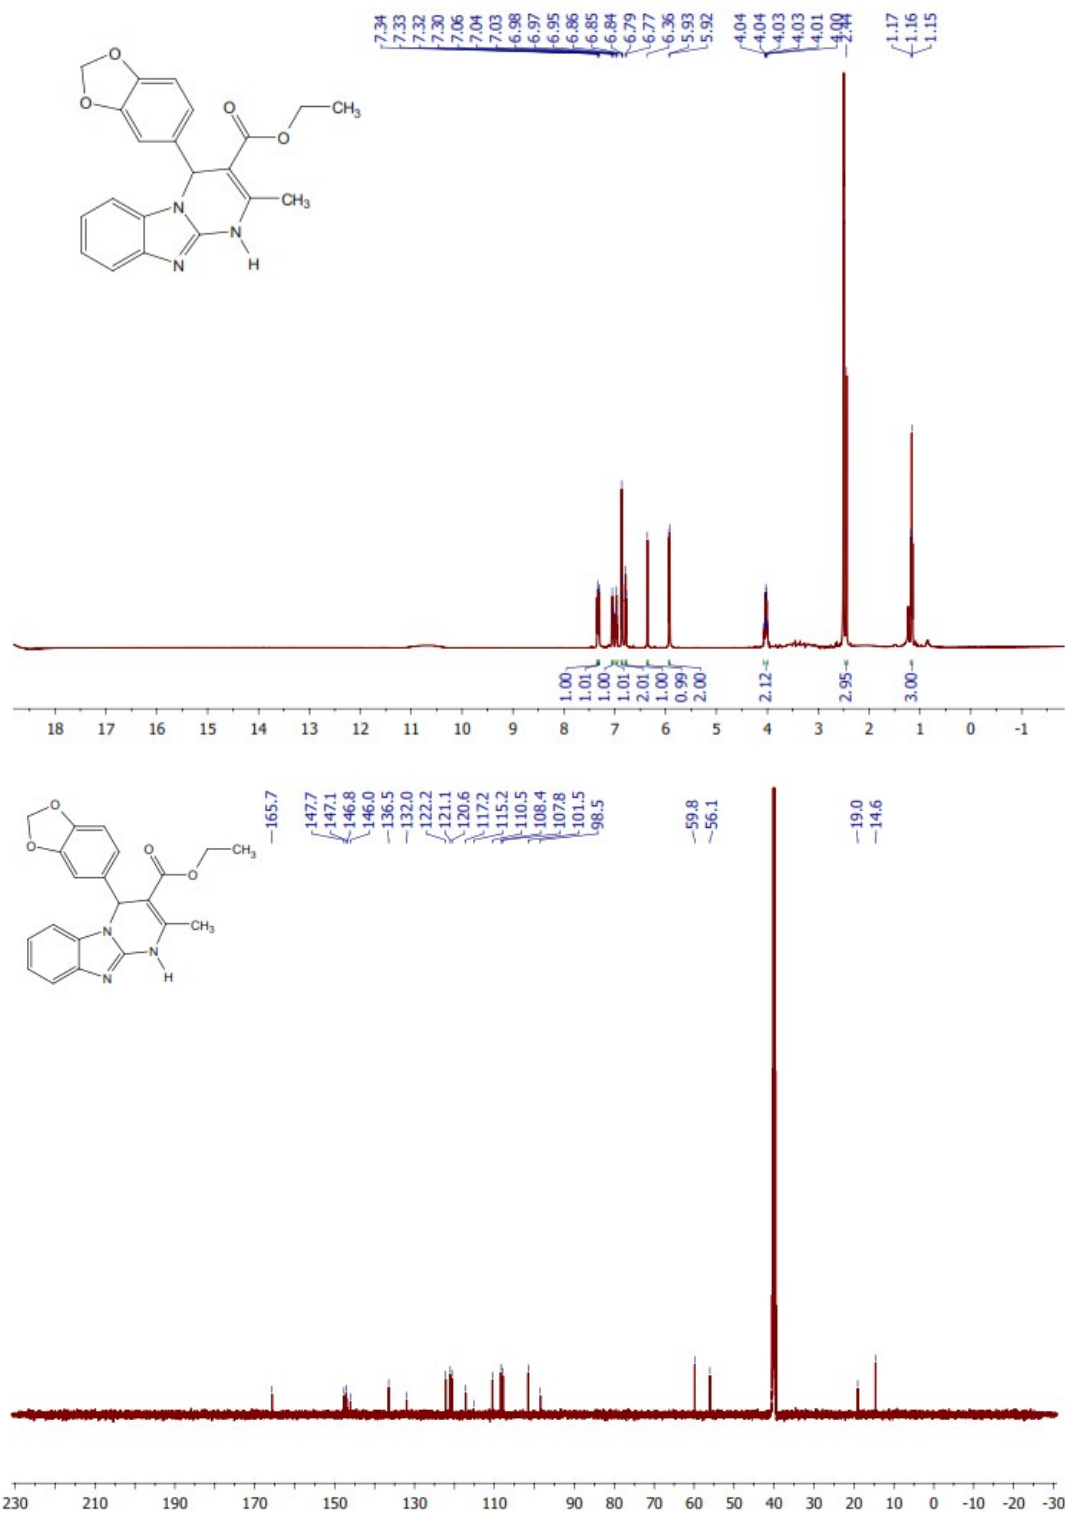

**Figure 14.** <sup>1</sup>H (top) and <sup>13</sup>C (bottom) NMR spectra of ethyl 4-(benzo[d][1,3]dioxol-5-yl)-2-methyl-1,4-dihydrobenzo[4,5]imidazo[1,2-a]pyrimidine-3-carboxylate

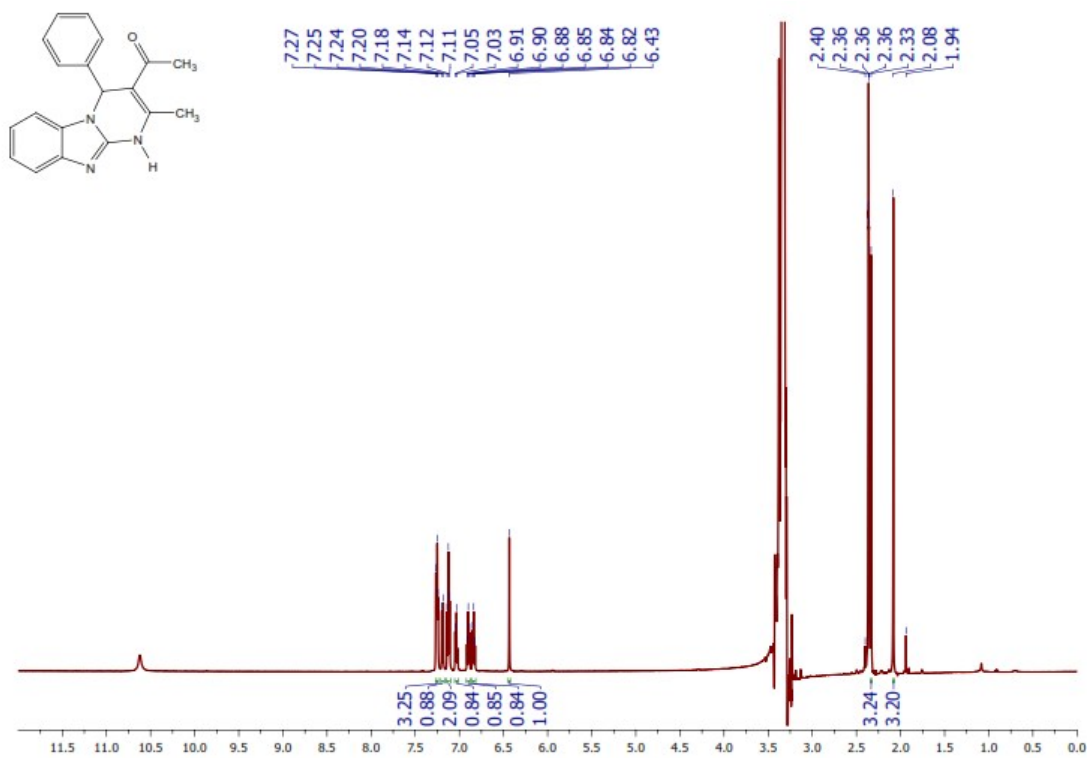

**Figure 15.** <sup>1</sup>H NMR spectrum, of 1-(2-methyl-4-phenyl-1,4-dihydrobenzo[4,5]imidazo[1,2-a]pyrimidin-3-yl)ethan-1-one



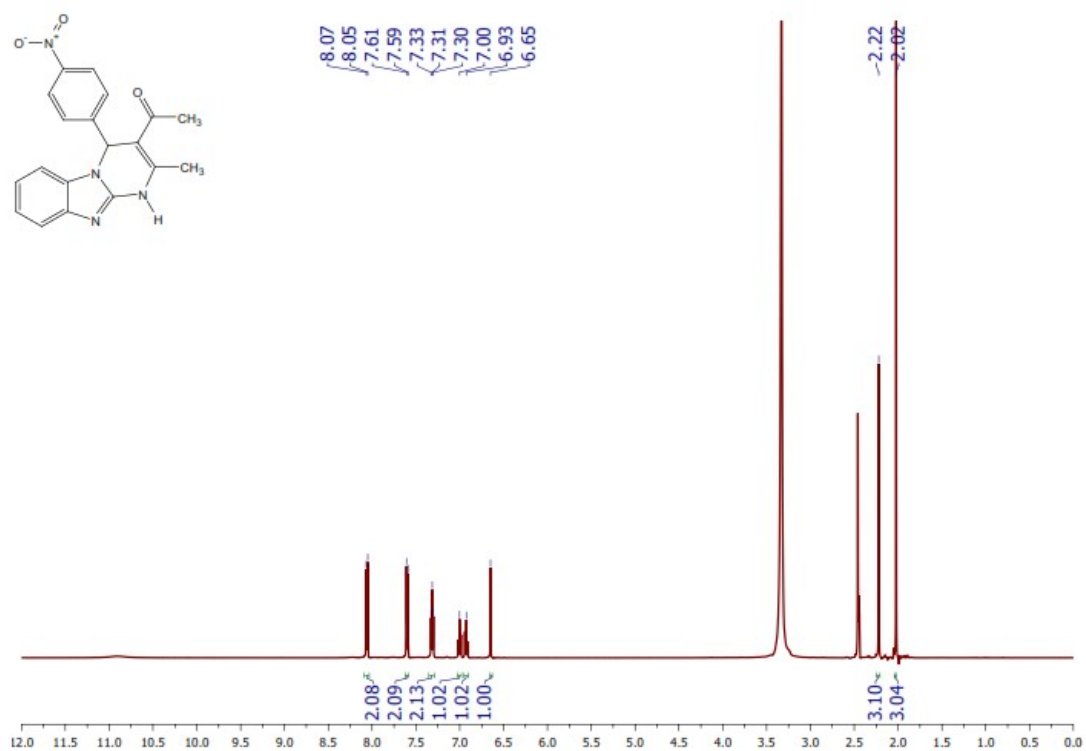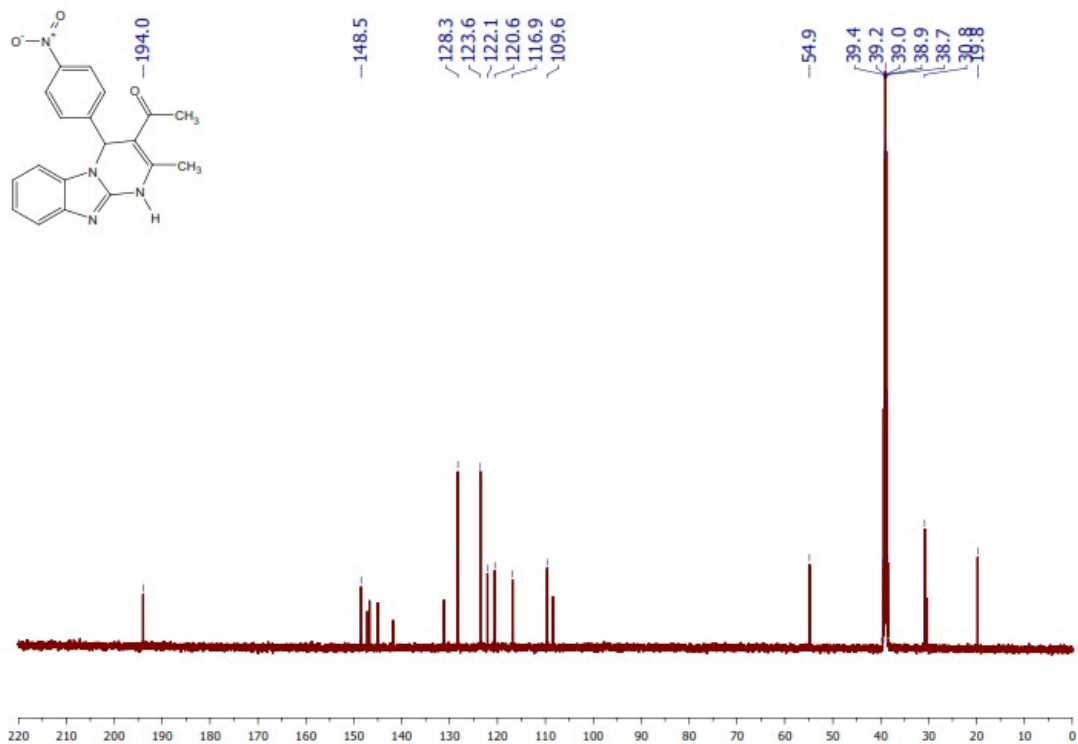

**Figure 16.** <sup>1</sup>H (top) and <sup>13</sup>C (bottom) NMR spectra of 1-(2-methyl-4-(4-nitrophenyl)-1,4-dihydrobenzo[4,5]imidazo[1,2-a]pyrimidin-3-yl)ethan-1-one

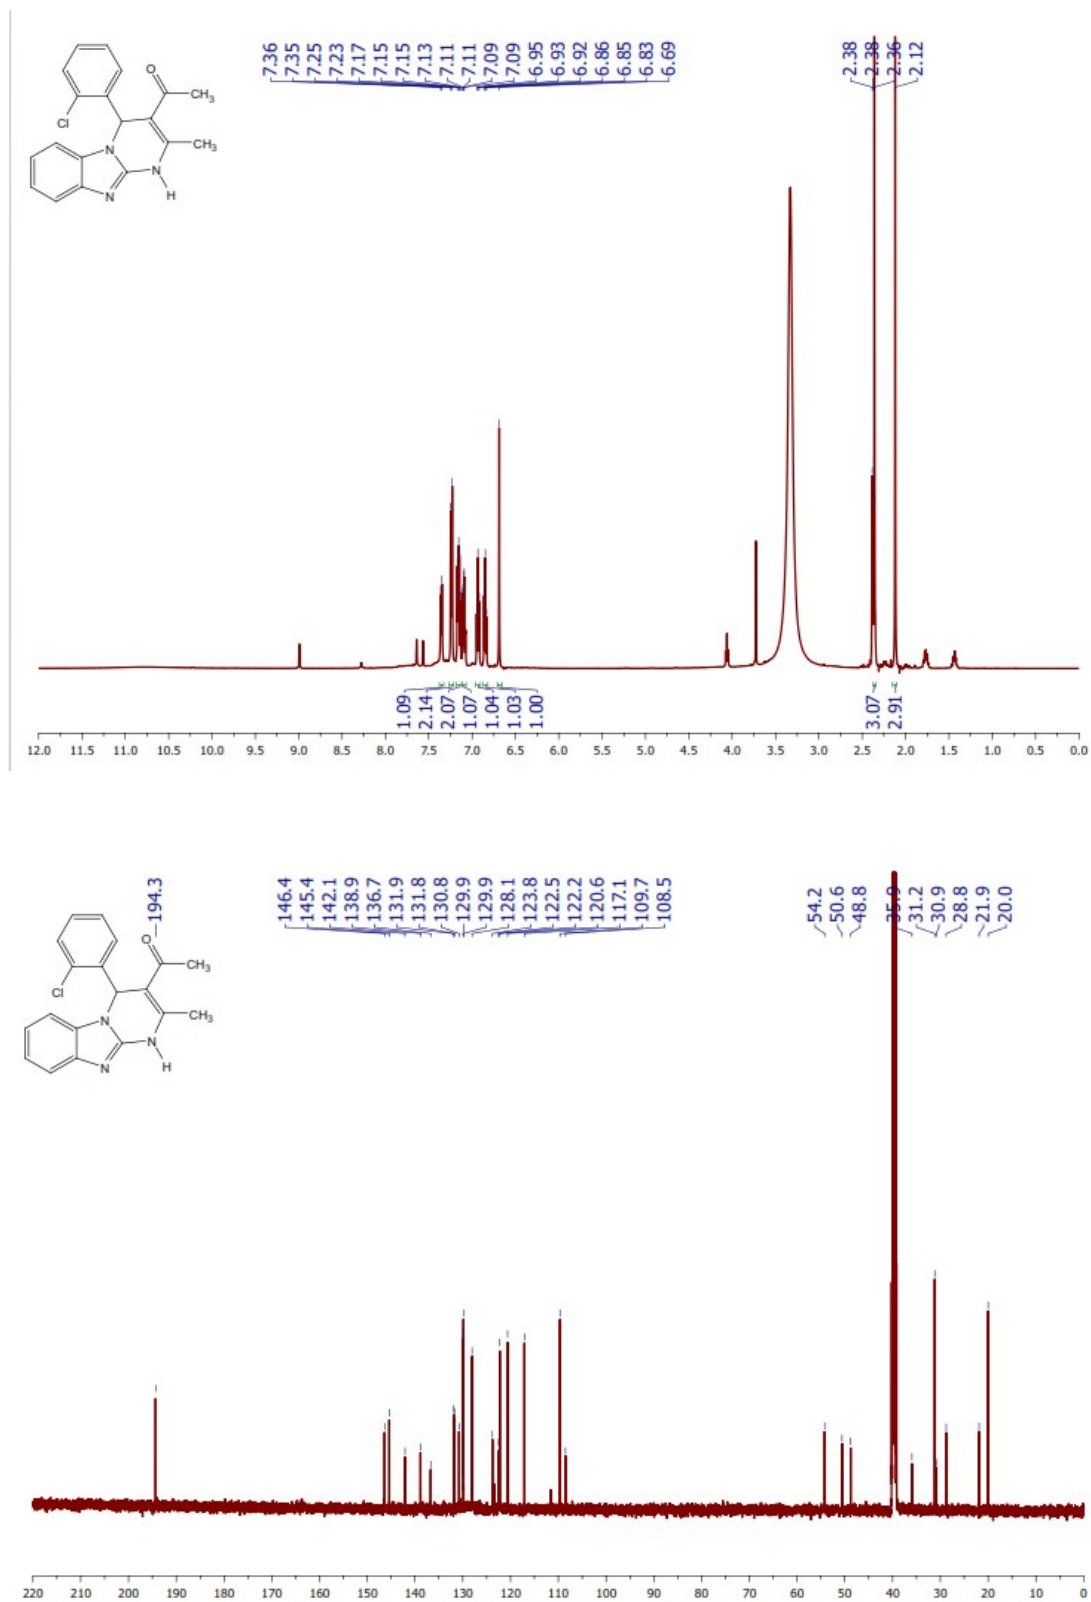

**Figure 17.** <sup>1</sup>H (top) and <sup>13</sup>C (bottom) NMR spectra of 1-(4-(2-chlorophenyl)-2-methyl-1,4-dihydrobenzo[4,5]imidazo[1,2-a]pyrimidin-3-yl)ethan-1-one

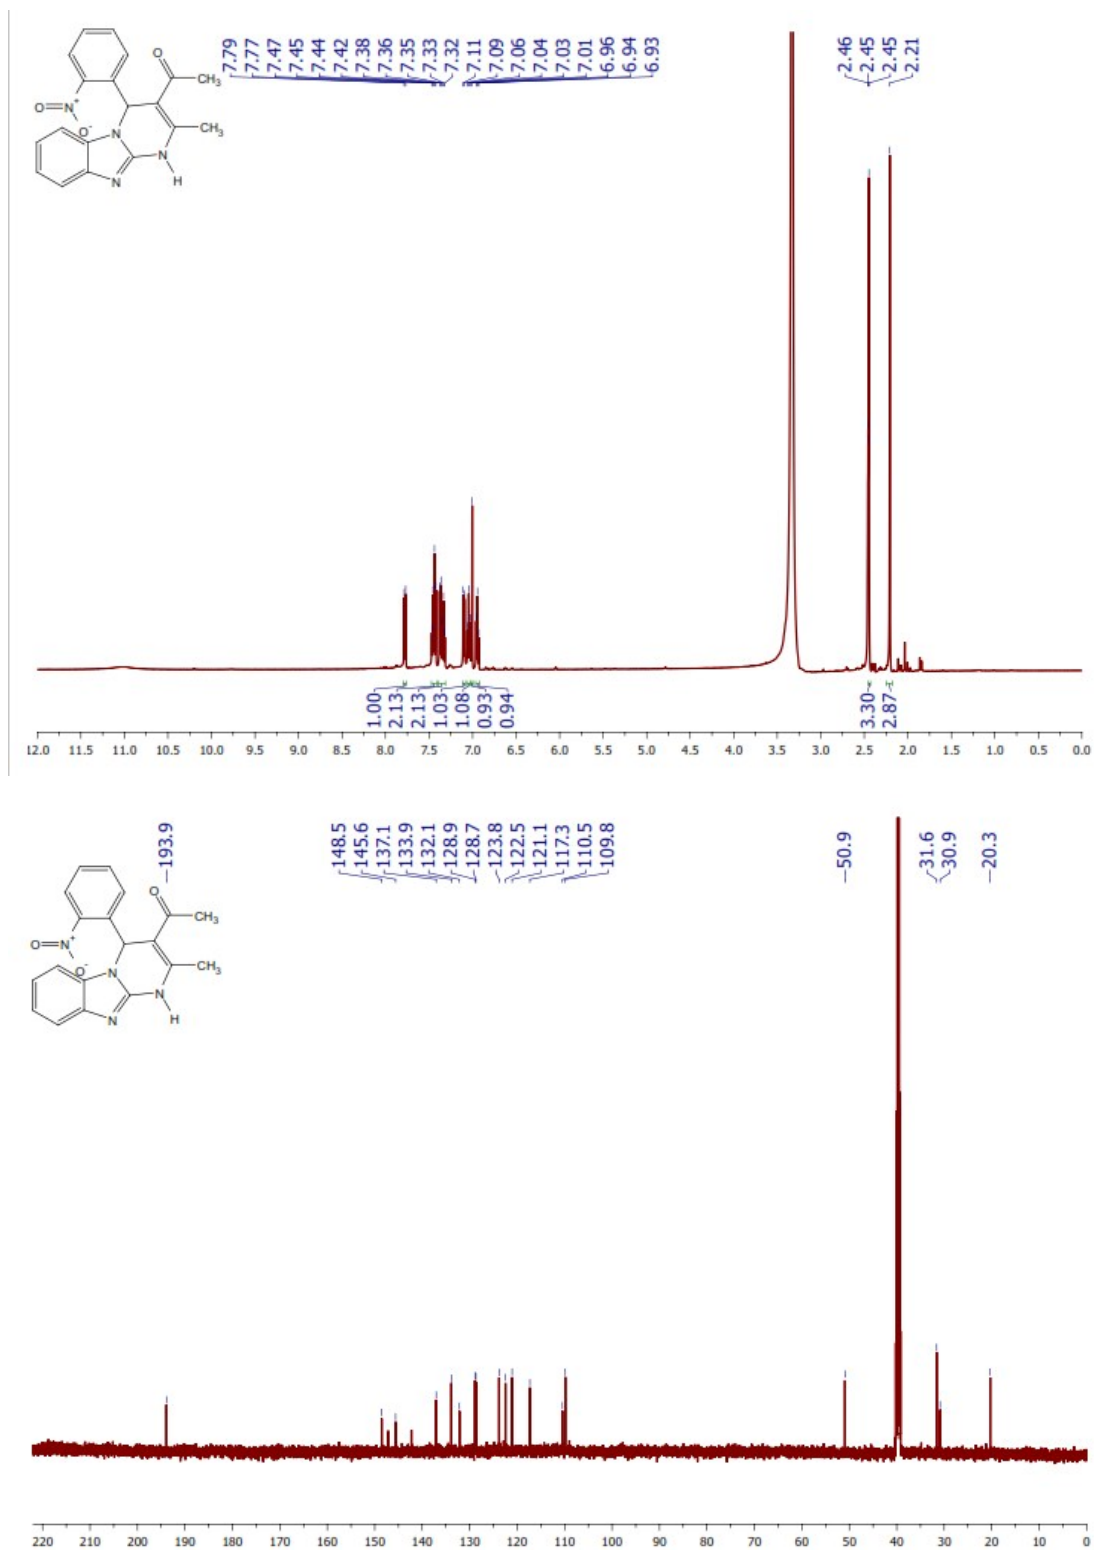

**Figure 18.**  $^1\text{H}$  (top) and  $^{13}\text{C}$  (bottom) NMR spectra of 1-(2-methyl-4-(2-nitrophenyl)-1,4-dihydrobenzo[4,5]imidazo[1,2-a]pyrimidin-3-yl)ethan-1-one

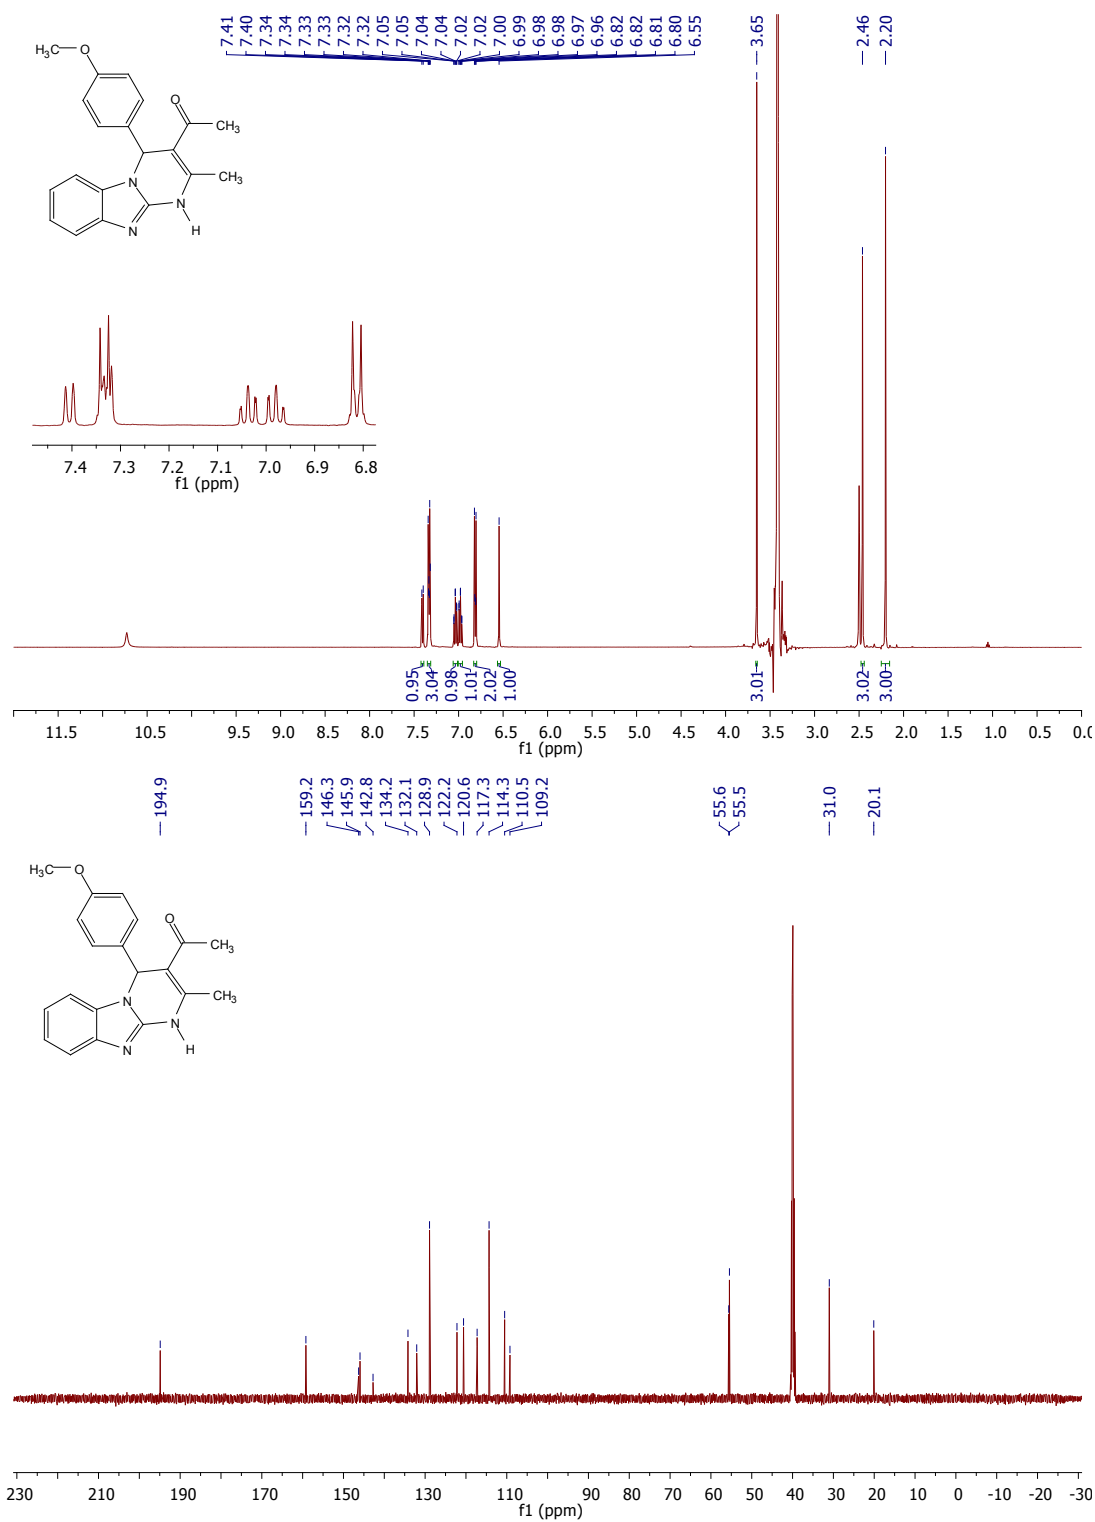

**Figure 19.** <sup>1</sup>H (top) and <sup>13</sup>C (bottom) NMR spectra of 1-(4-(4-methoxyphenyl)-2-methyl-1,4-dihydrobenzo[4,5]imidazo[1,2-a]pyrimidin-3-yl)ethan-1-one

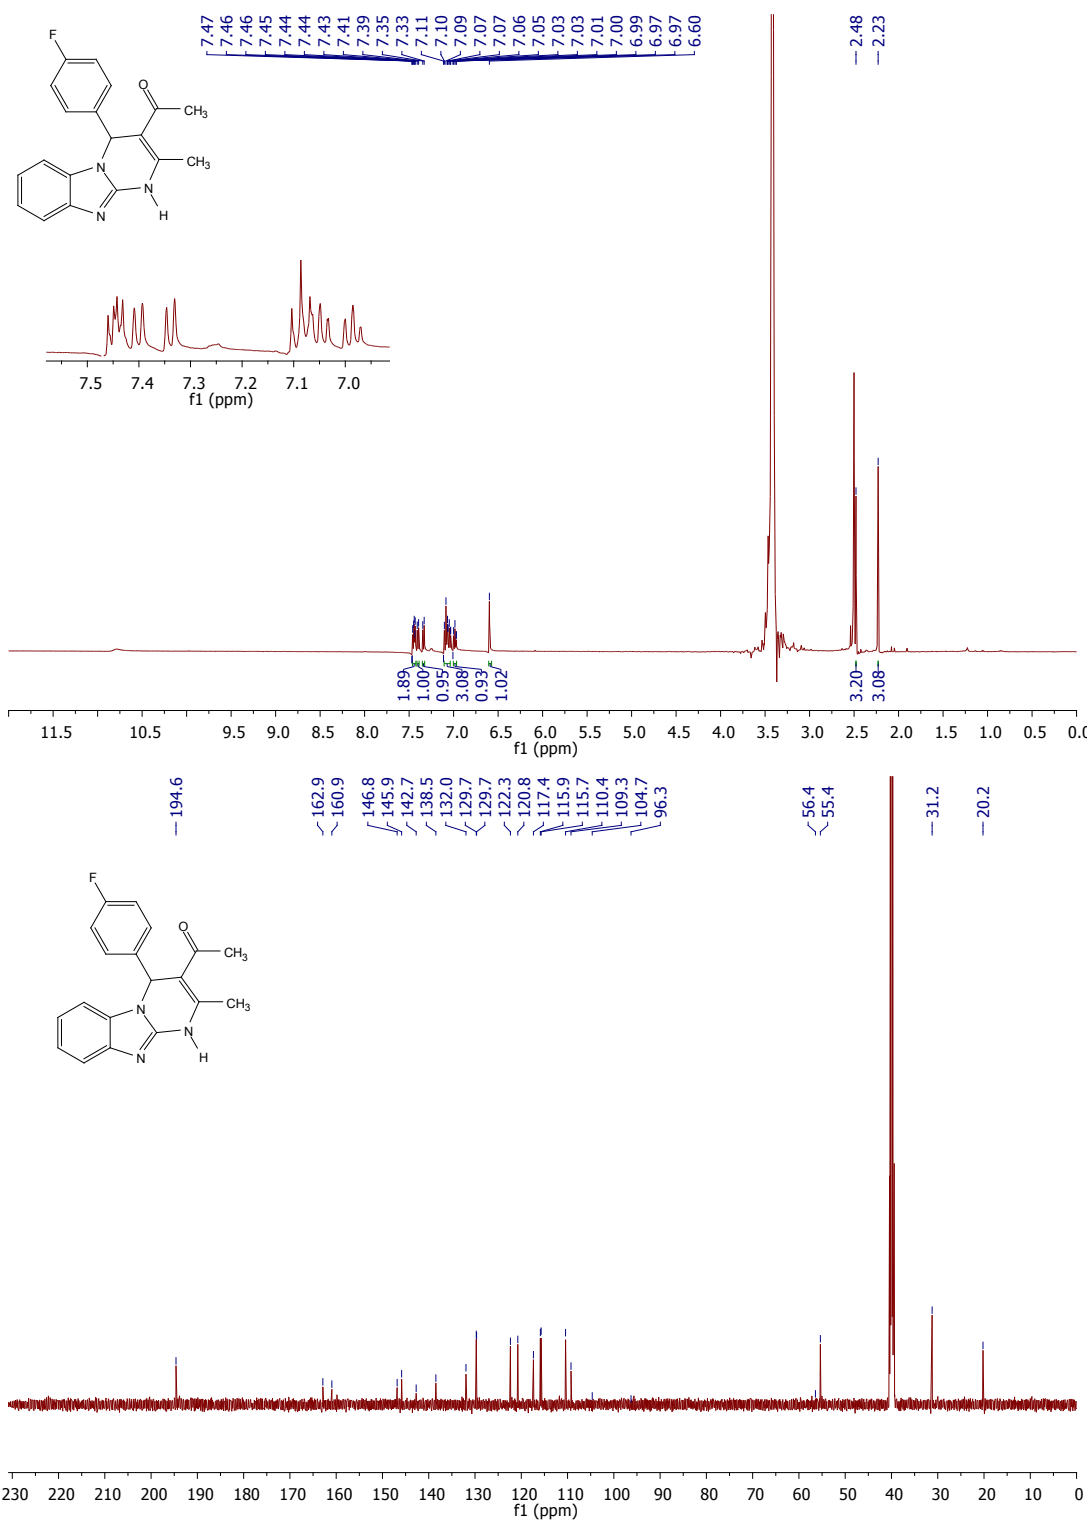

**Figure 20.** <sup>1</sup>H (top) and <sup>13</sup>C (bottom) NMR spectra of 1-(4-(4-fluorophenyl)-2-methyl-1,4-dihydrobenzo[4,5]imidazo[1,2-a]pyrimidin-3-yl)ethan-1-one

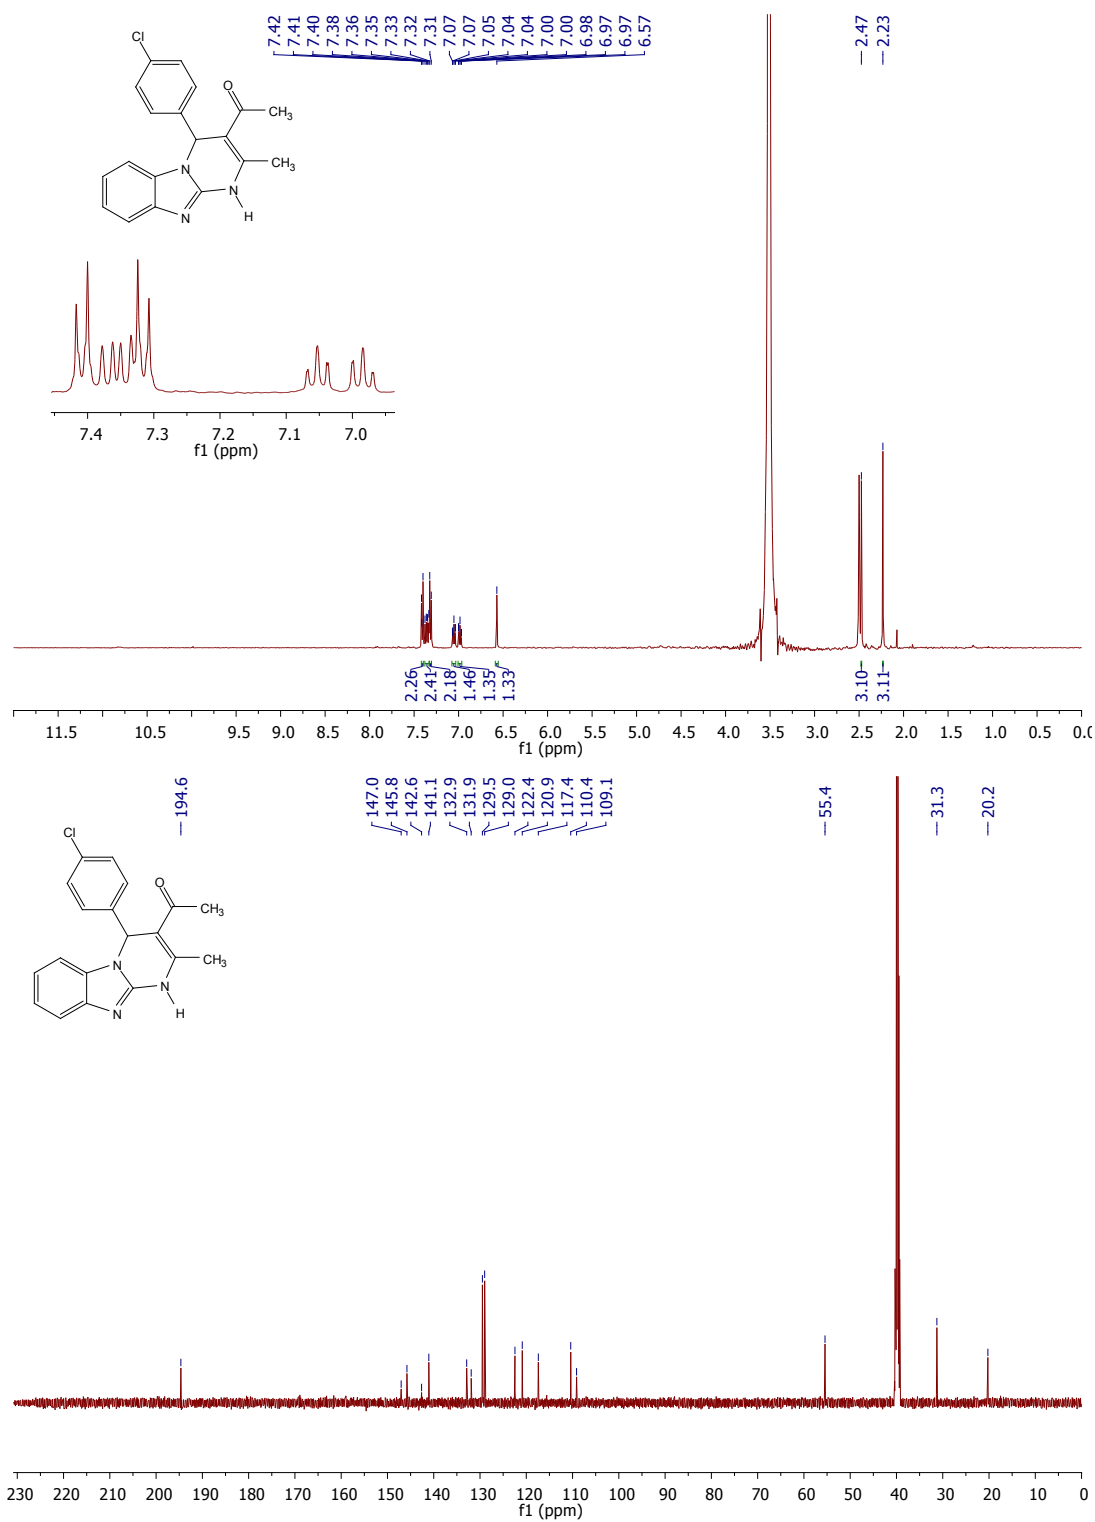

**Figure 21.** <sup>1</sup>H (top) and <sup>13</sup>C (bottom) NMR spectra of 1-(4-(4-chlorophenyl)-2-methyl-1,4-dihydrobenzo[4,5]imidazo[1,2-a]pyrimidin-3-yl)ethan-1-one

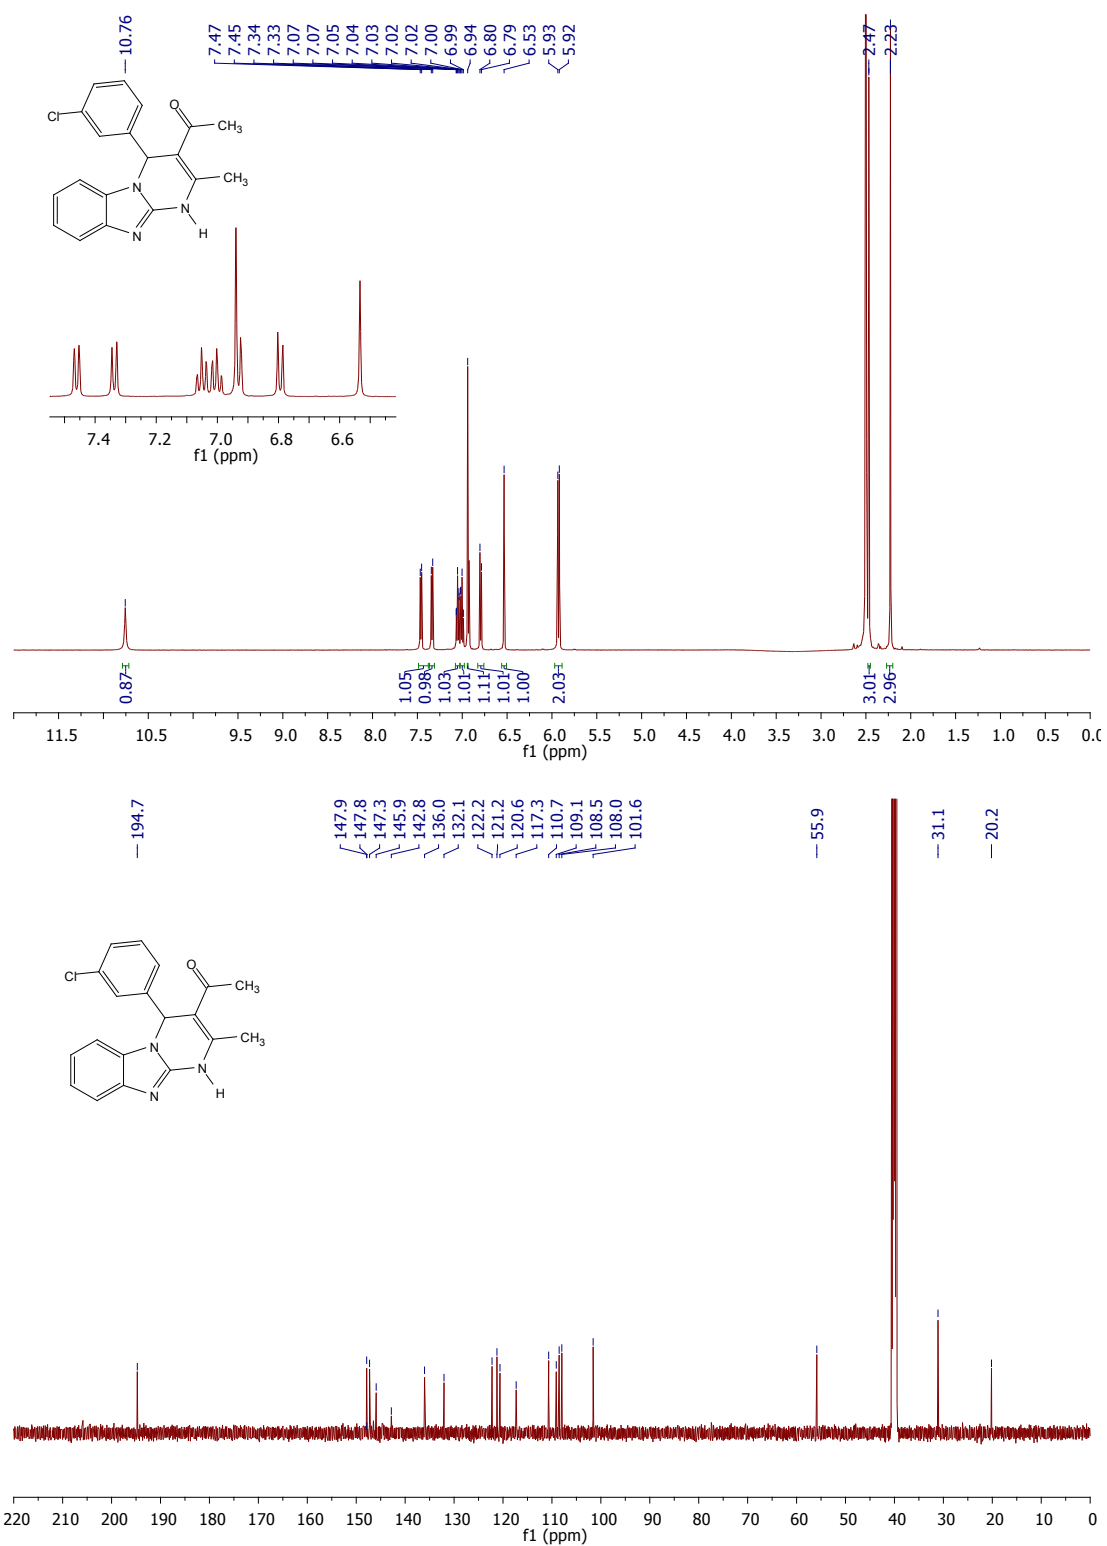

**Figure 22.** <sup>1</sup>H (top) and <sup>13</sup>C (bottom) NMR spectra of 1-(4-(3-chlorophenyl)-2-methyl-1,4-dihydrobenzo[4,5]imidazo[1,2-a]pyrimidin-3-yl)ethan-1-one

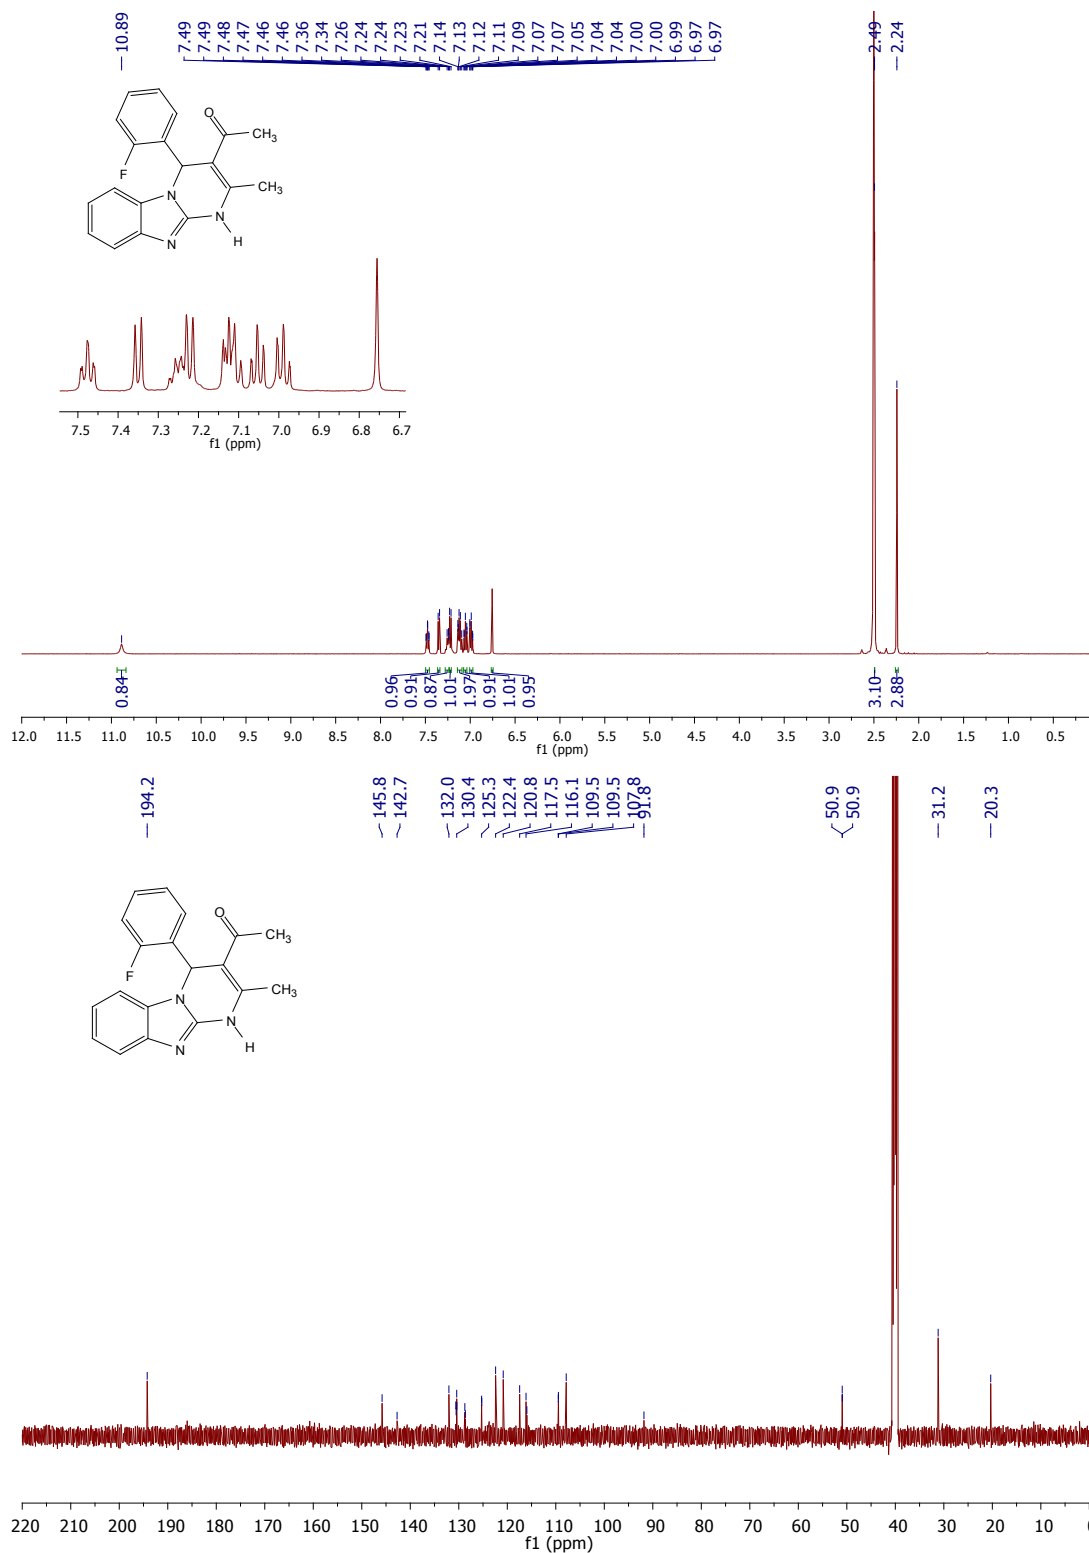

**Figure 233.** <sup>1</sup>H (top) and <sup>13</sup>C (bottom) NMR spectra of 1-(4-(2-fluorophenyl)-2-methyl-1,4-dihydrobenzo[4,5]imidazo[1,2-a]pyrimidin-3-yl)ethan-1-one



## NMR Data of 2,3-dihydroquinazolin-4(1H)-one

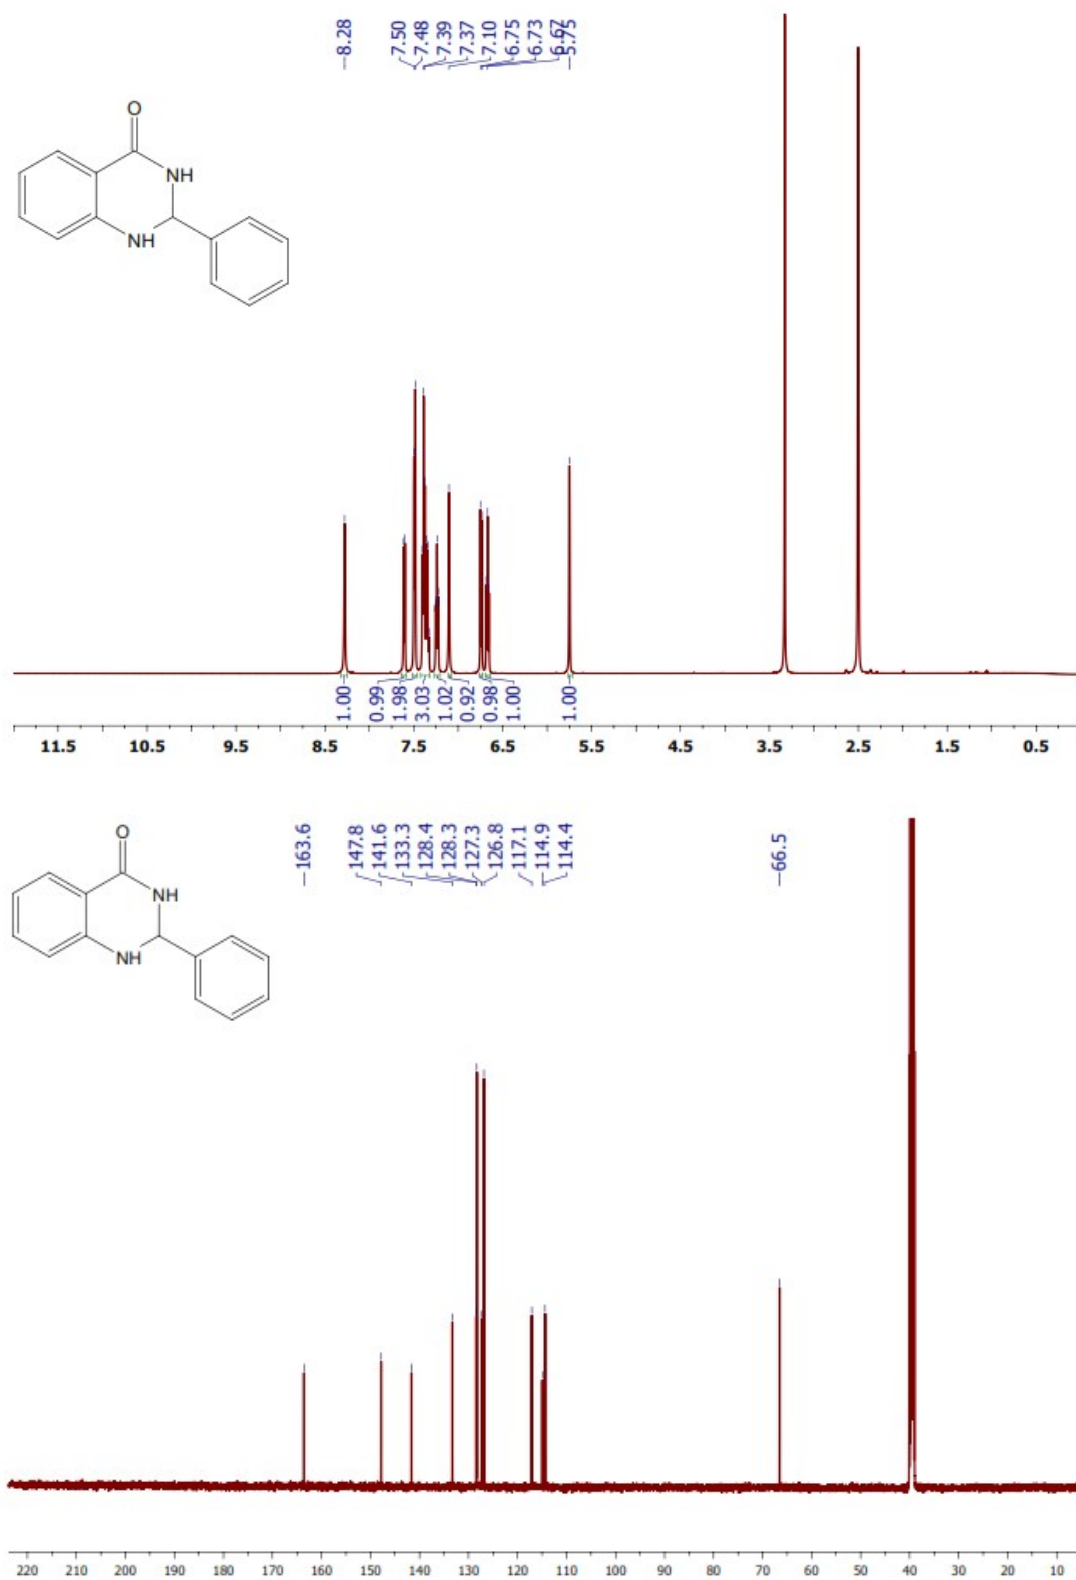

Fig. 24 <sup>1</sup>H (top) and <sup>13</sup>C (bottom) NMR spectra of 2-phenyl-2,3-dihydroquinazolin-4(1H)-one

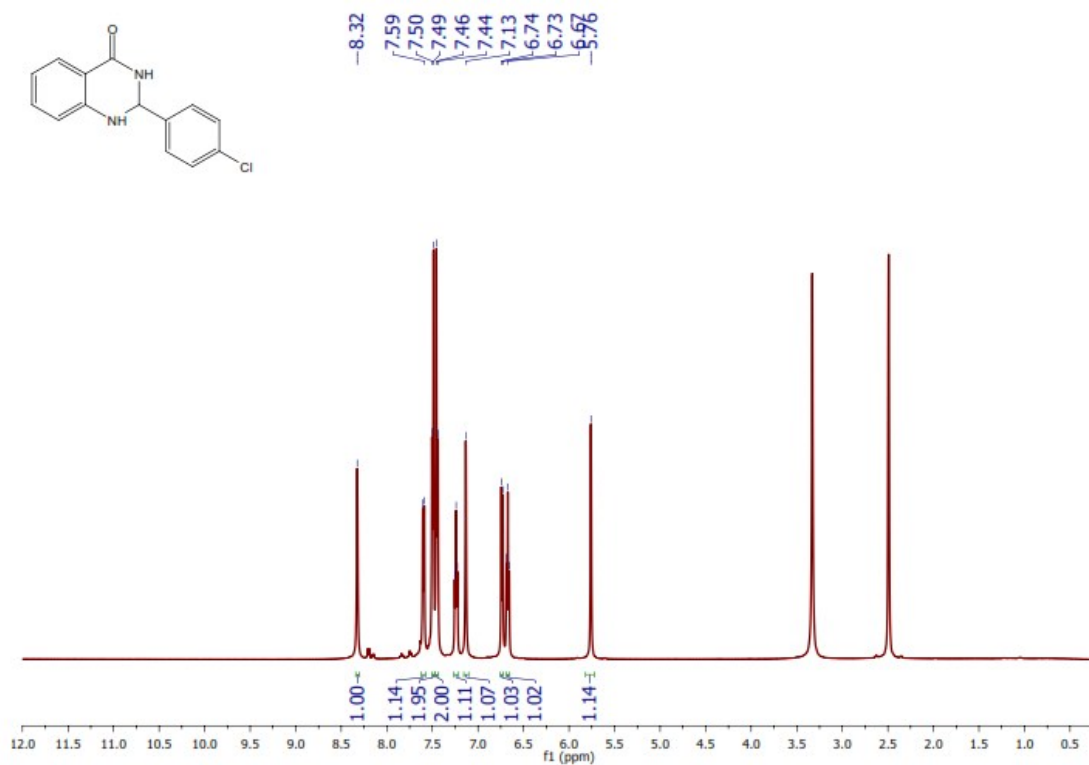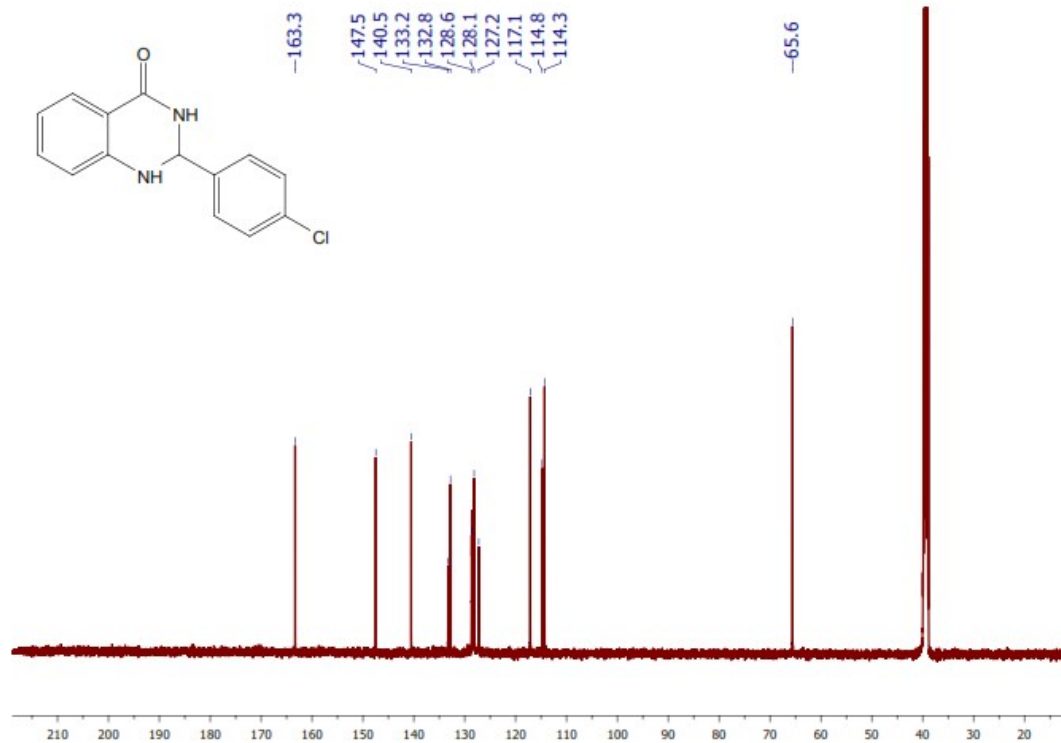

**Fig. 25** <sup>1</sup>H (top) and <sup>13</sup>C (bottom) NMR spectra of 2-(4-chlorophenyl)-2,3-dihydroquinazolin-4(1*H*)-one

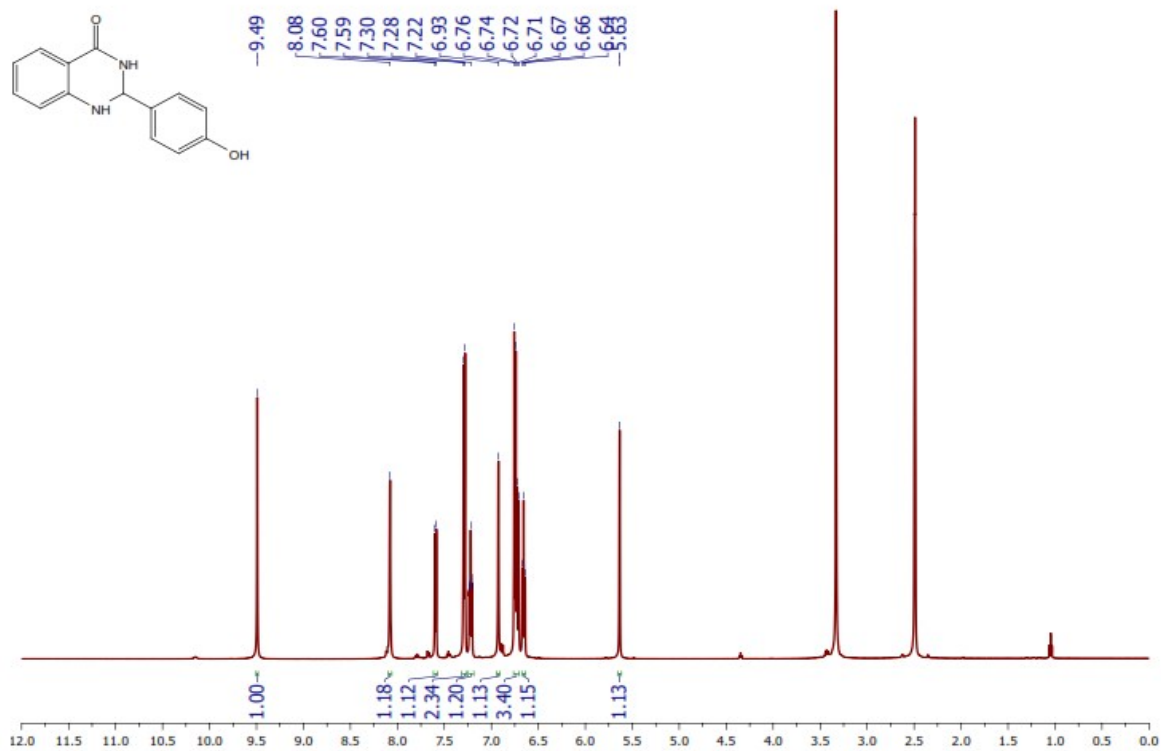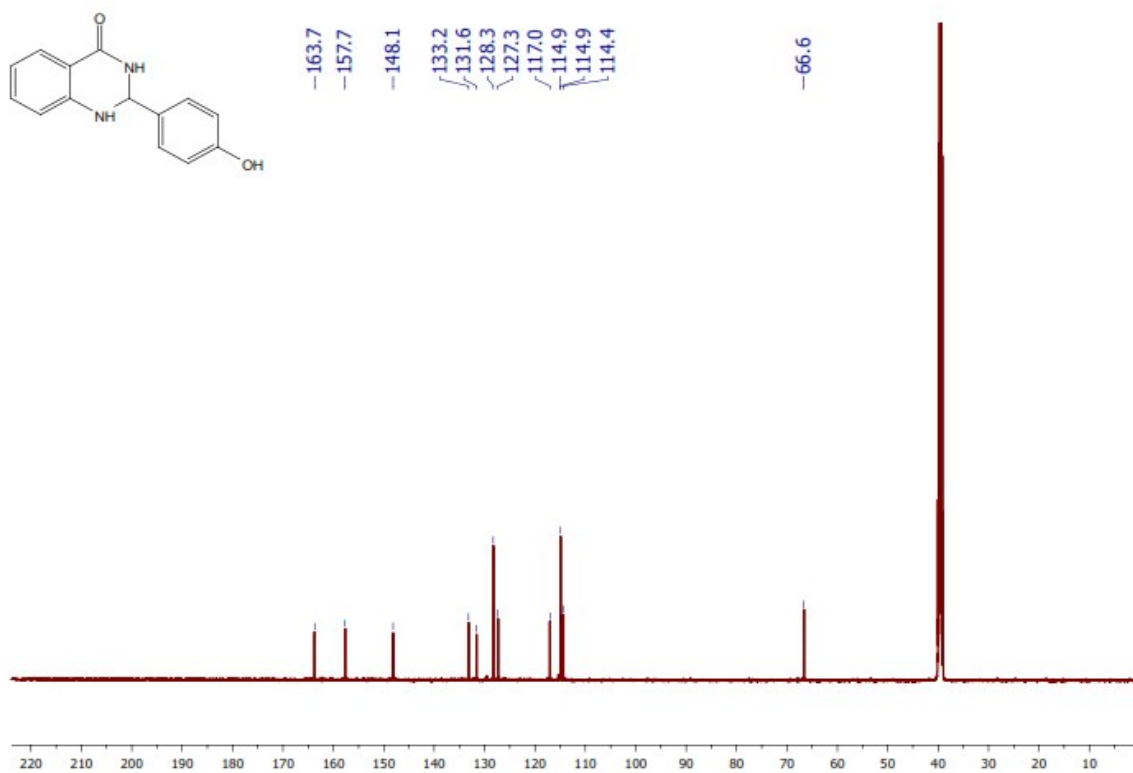

Fig. 26 <sup>1</sup>H (top) and <sup>13</sup>C (bottom) NMR spectra of 2-(4-hydroxyphenyl)-2,3-dihydroquinazolin-4(1H)-one

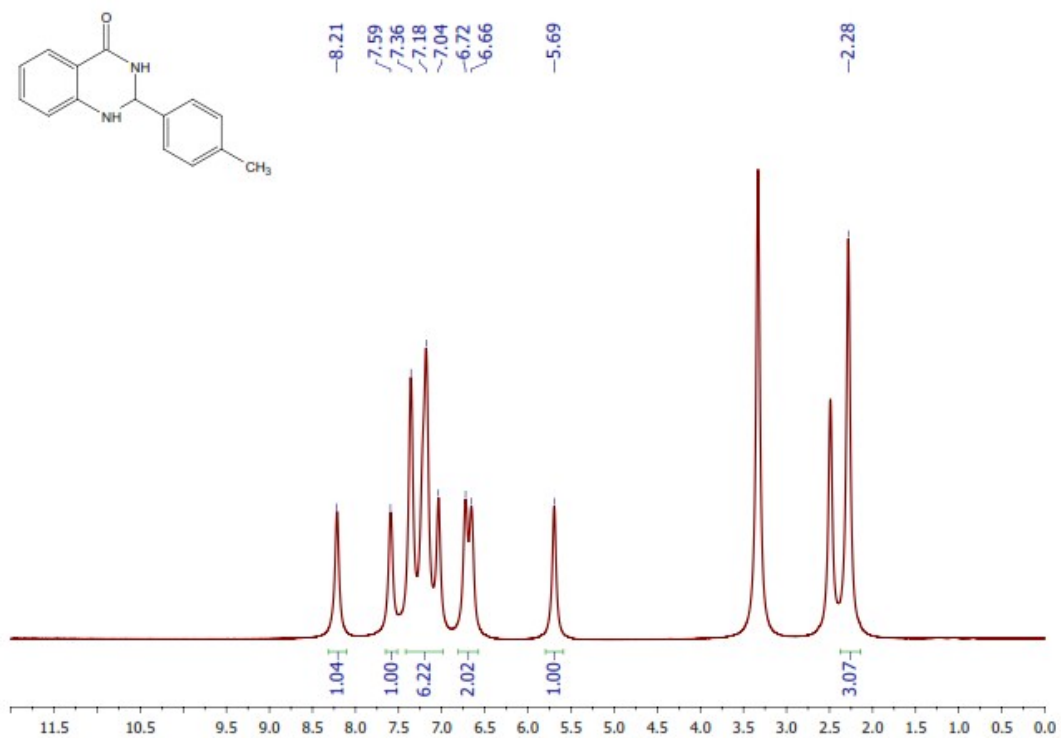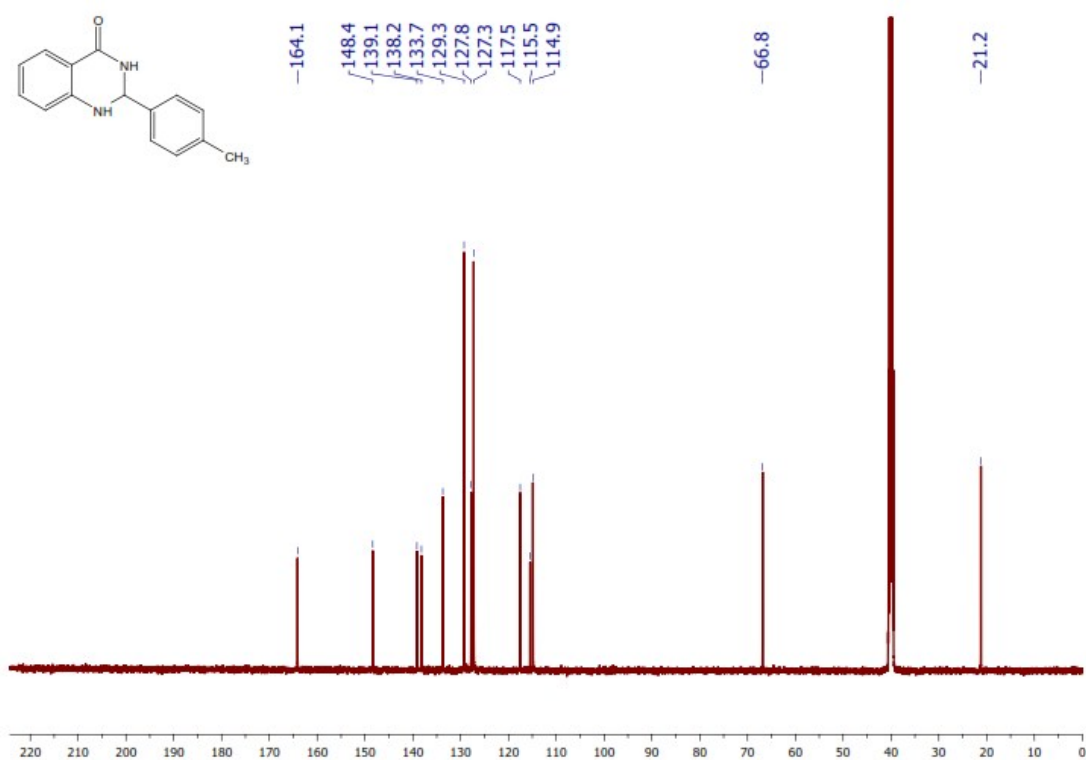

**Fig. 27** <sup>1</sup>H (top) and <sup>13</sup>C (bottom) NMR spectra of 2-(p-tolyl)-2,3-dihydroquinazolin-4(1*H*)-one

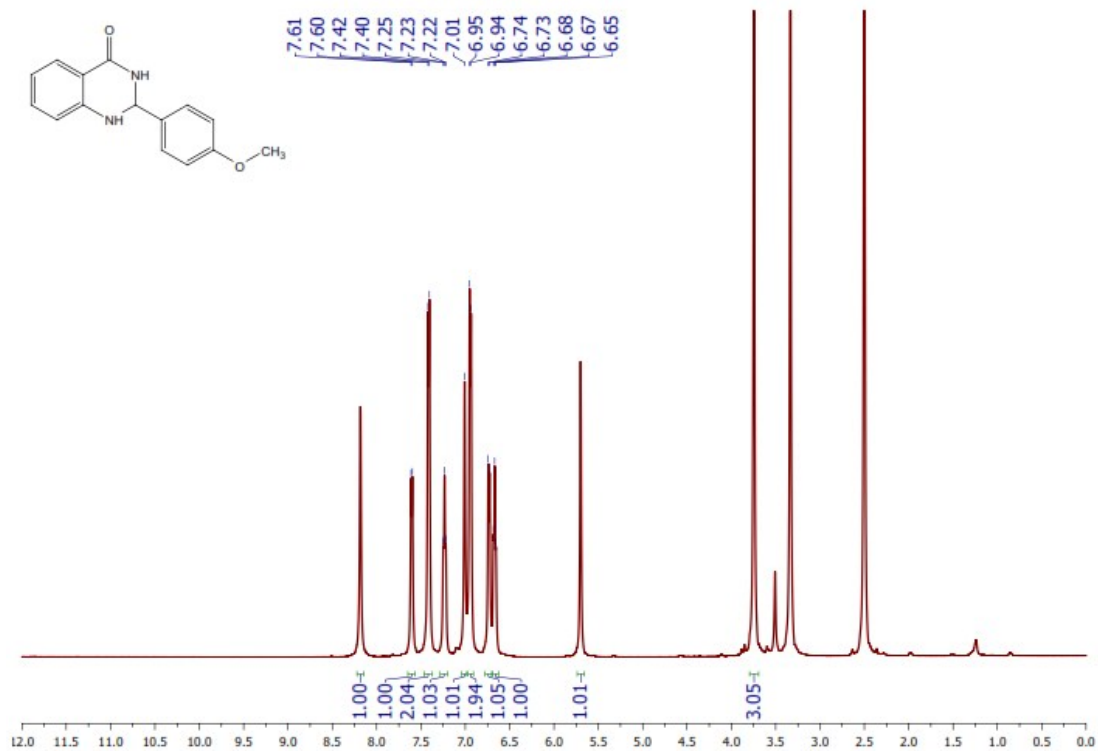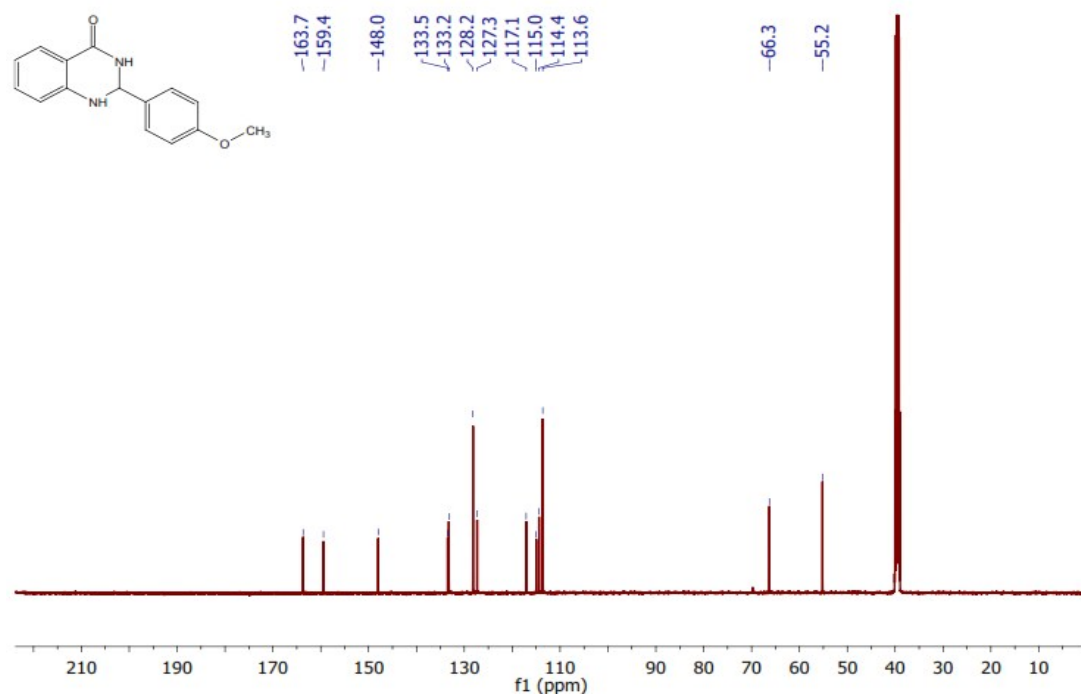

**Fig. 28** <sup>1</sup>H (top) and <sup>13</sup>C (bottom) NMR spectra of 2-(4-methoxyphenyl)-2,3-dihydroquinazolin-4(1*H*)-one

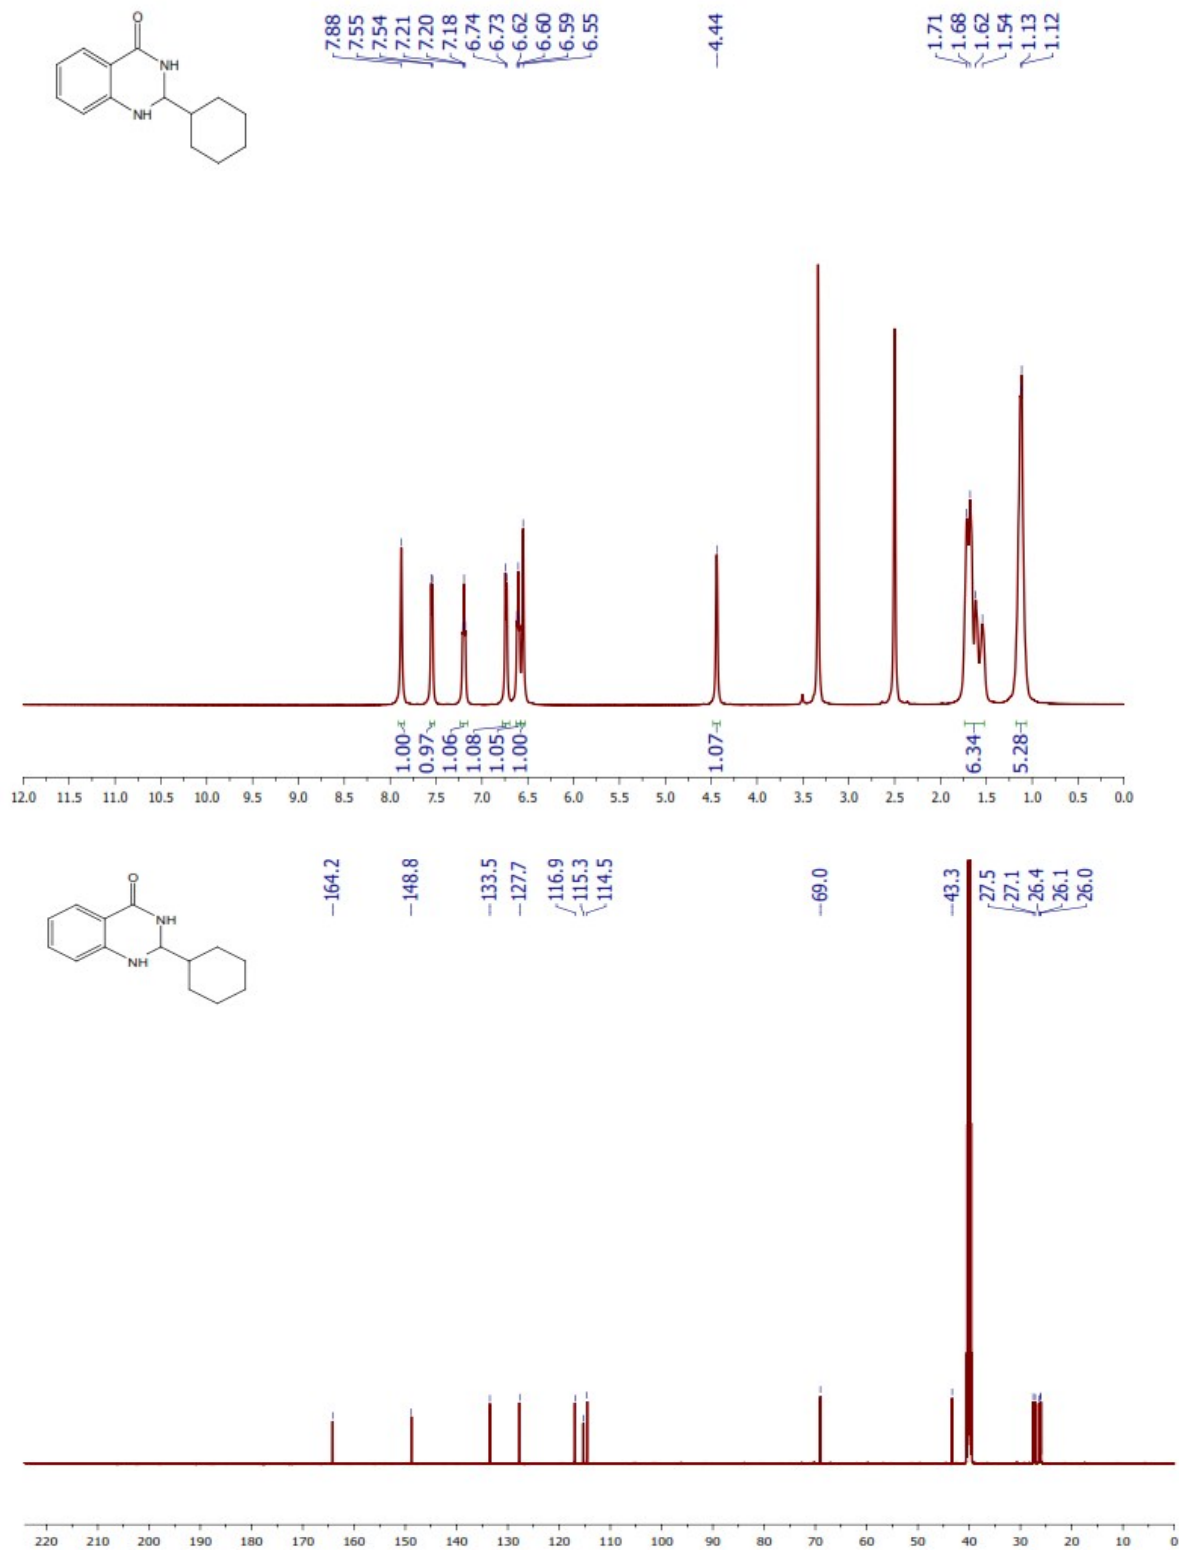

**Fig. 29 <sup>1</sup>H (top) and <sup>13</sup>C (bottom) NMR spectra of 2- cyclohexyl-2,3-dihydroquinazolin-4(1*H*)-one**

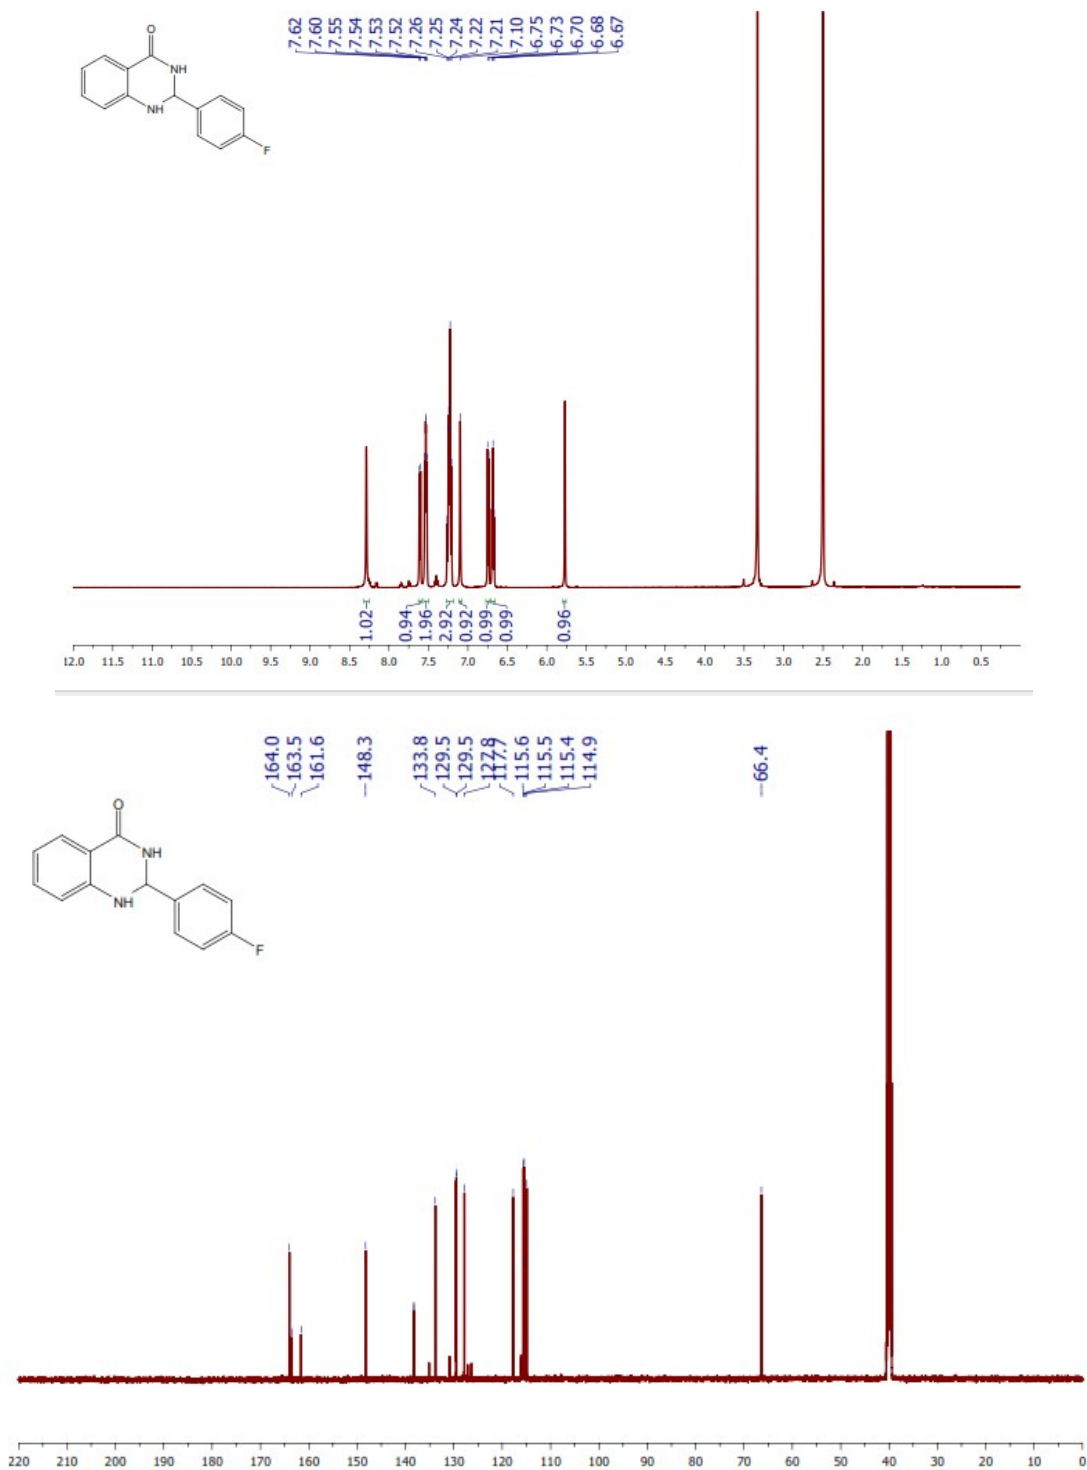

**Fig. 30 <sup>1</sup>H (top) and <sup>13</sup>C (bottom) NMR spectra of 2-(4-fluorophenyl)-2,3-dihydroquinazolin-4(1*H*)-one**

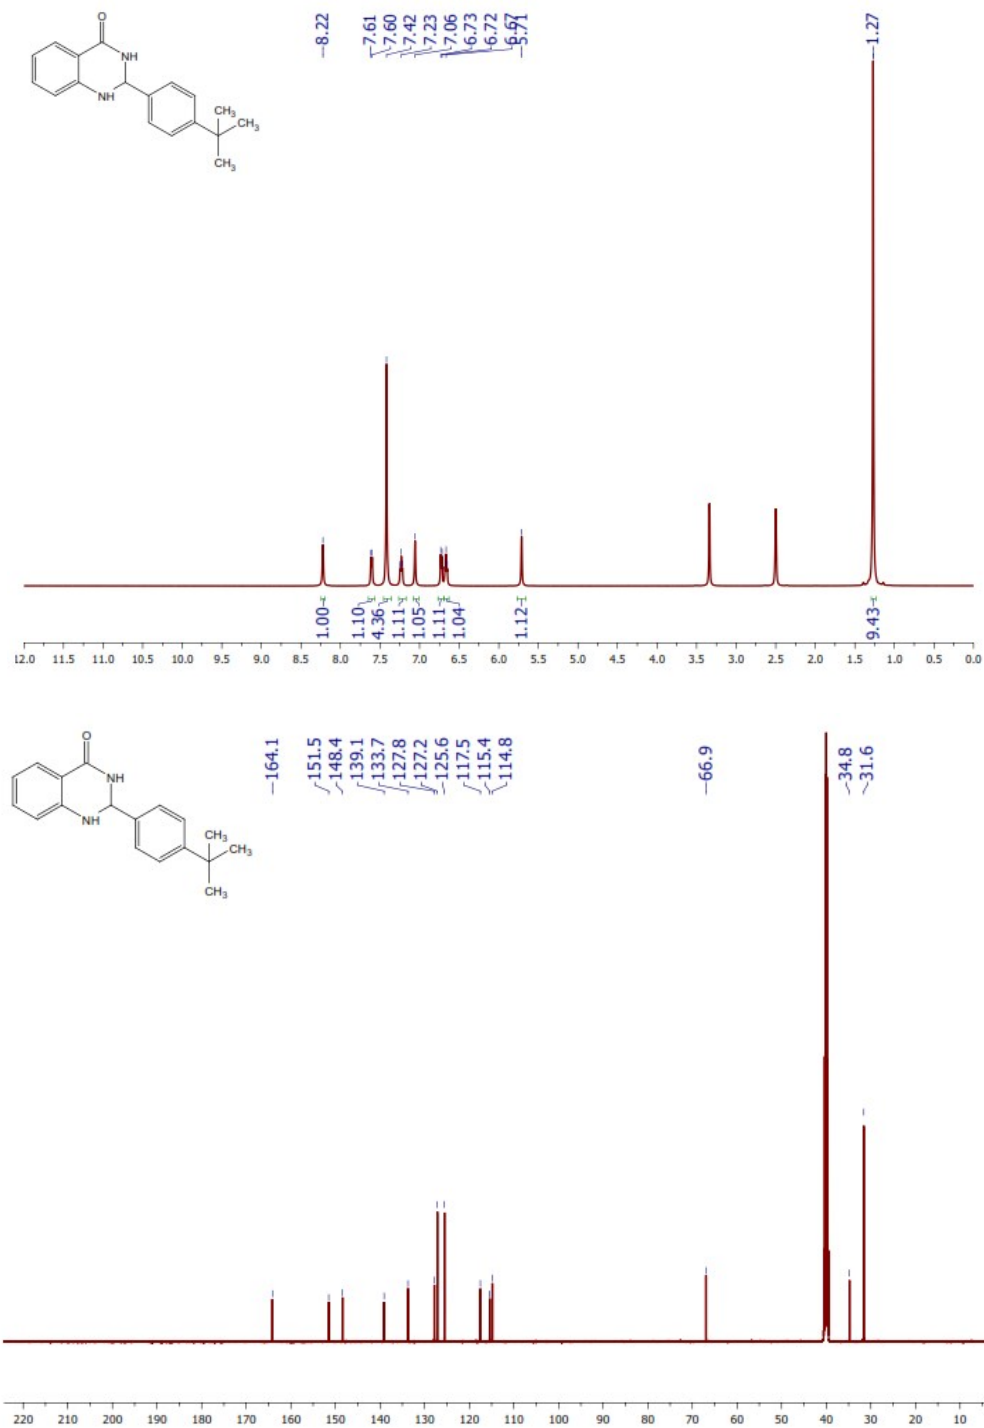

**Fig. 31 <sup>1</sup>H (top) and <sup>13</sup>C (bottom) NMR spectra of 2-(4-tert-butryl)phenyl-2,3-dihydroquinazolin-4(1*H*)-one**



## Section S6. References

1. P. H. Tran, A.-T. Duy Nguyen, H. T. Nguyen and T. N. Le, *RSC Adv.*, 2017, **7**, 54399-54406.
2. J. Liu, M. Lei and L. Hu, *Green Chem.*, 2012, **14**, 840-846.
3. C. Yao, S. Lei, C. Wang, T. Li, C. Yu, X. Wang and S. Tu, *J. Heterocyclic Chem.*, 2009, **47**, 26-32.
4. T. Raj, H. Sharma, Mayank, A. Singh, T. Aree, N. Kaur, N. Singh and D. O. Jang, *ACS Sus. Chem. Eng.*, 2017, **5**, 1468-1475.
5. M. V. Reddy, A. V. S. Reddy and Y. T. Jeong, *Res. Chem. Intermed.*, 2016, **42**, 4893-4906.
6. M. Abedini, F. Shirini, M. Mousapour and O. Goli Jolodar, *Res. Chem. Intermed.*, 2016, **42**, 6221-6229.
7. H. R. Shaterian, N. Fahimi and K. Azizi, *Res. Chem. Intermed.*, 2013, **40**, 1879-1898.
8. J. Chen, W. Su, H. Wu, M. Liu and C. Jin, *Green Chem.*, 2007, **9**, 972-975.
9. S. Nagarajan, T. M. Shaikh and E. Kandasamy, *New J. Chem.*, 2015, **39**, 9693-9699.
10. Y. Luo, Y. Wu, Y. Wang, H. Sun, Z. Xie, W. Zhang and Z. Gao, *RSC Adv.*, 2016, **6**, 66074-66077.
11. L. Shiri, H. Narimani and M. Kazemi, *Appl Organometal Chem.*, 2018, **32**, e3999.
12. M. Sharma, S. Pandey, K. Chauhan, D. Sharma, B. Kumar and P. M. Chauhan, *J. Org. Chem.*, 2012, **77**, 929-937.
